# Supplementary material for: Structure, polymorphism and luminescence of cyanate iodides MI(OCN) (M = Ba, Eu, and Sr)
Source: Royal Society of Chemistry journal article supplement (doi:10.1039/d0dt02126a), 2020-01-01
Supplement: d0dt02126a14.pdf [file d0dt02126a14.pdf]

Supplementary material of :

## **Structure, Polymorphism and Luminescence of Cyanate Iodides MI(OCN) (M = Ba, Eu, Sr)**

**Amira Siai,<sup>a\*</sup> Luzian Hämmerle,<sup>a</sup> David Enseling,<sup>b</sup> Markus Ströbele,<sup>a</sup> Thomas Jüstel,<sup>b</sup> and  
Hans-Jürgen Meyer<sup>a</sup>**

<sup>a</sup> Section for Solid State and Theoretical Inorganic Chemistry, Institute of Inorganic Chemistry, University of Tübingen, Auf der Morgenstelle  
18, 72076 Tübingen, Germany.

<sup>b</sup> Münster University of Applied Sciences, Department Chemical Engineering, Stegerwaldstrasse 39, 48565 Steinfurt, Germany.

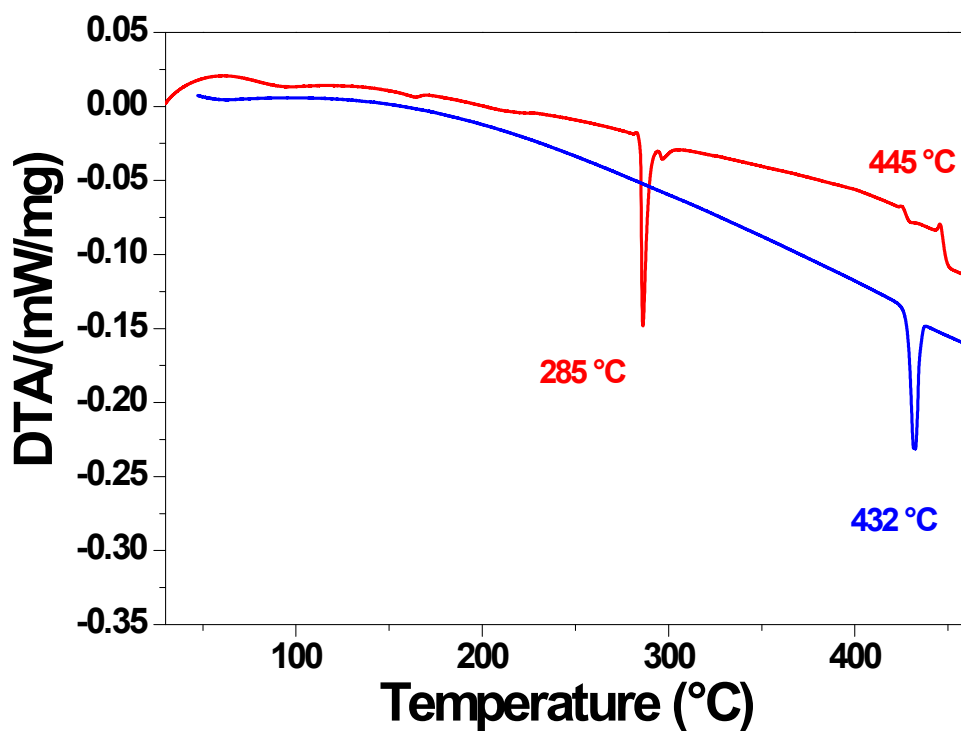

Figure S1. Differential thermal analysis (DTA) of the reaction  $\text{SrI}_2$  and  $\text{KOCN}$  (1:1) in silica ampoule.

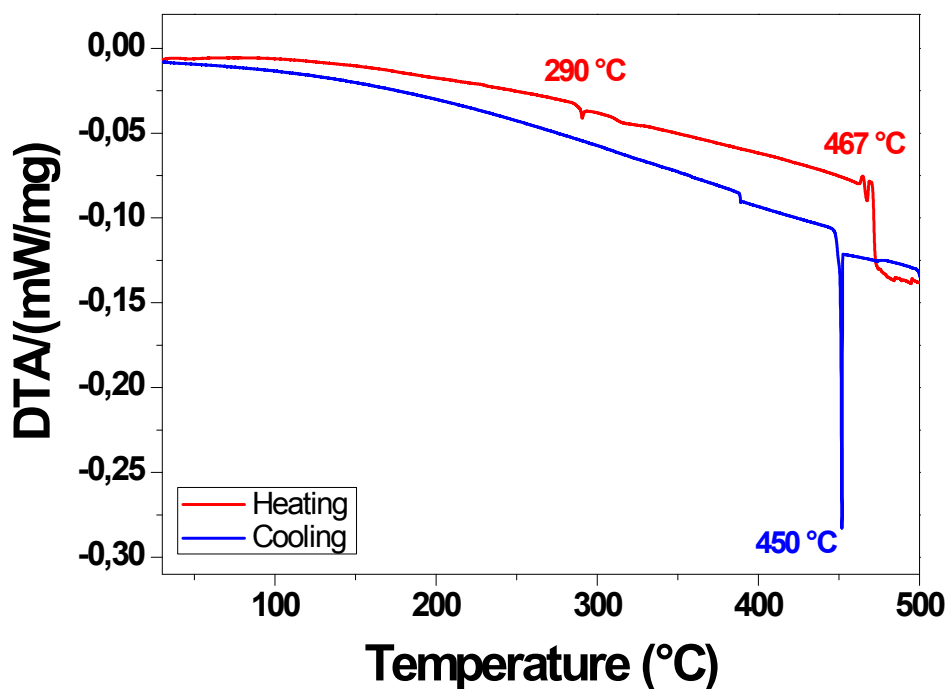

Figure S2. Differential thermal analysis (DTA) of the reaction  $\text{BaI}_2$  and  $\text{KOCN}$  (1:1) in silica ampoule. Heating and cooling cycles are represented in red and blue respectively.

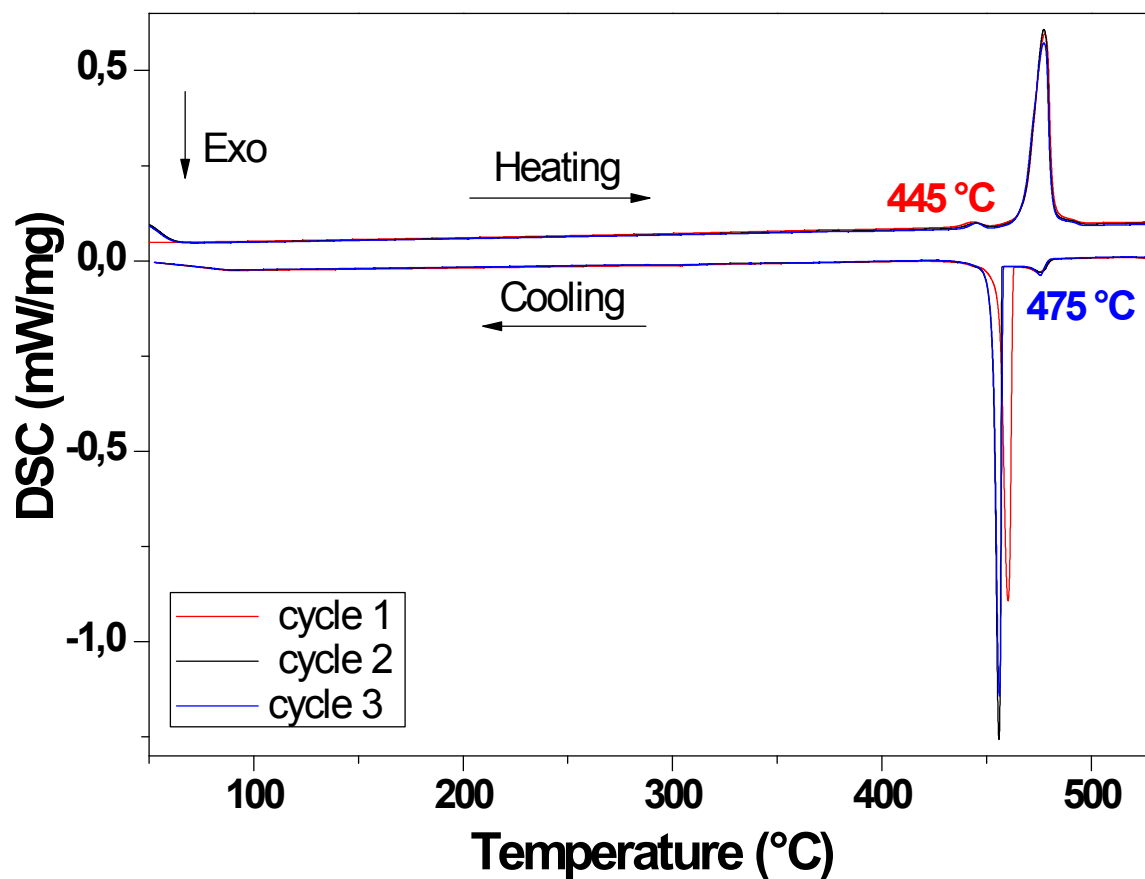

**Figure S3.** Differential scanning calorimetry (DSC) of  $\alpha$ -BaI(OCN) phase.

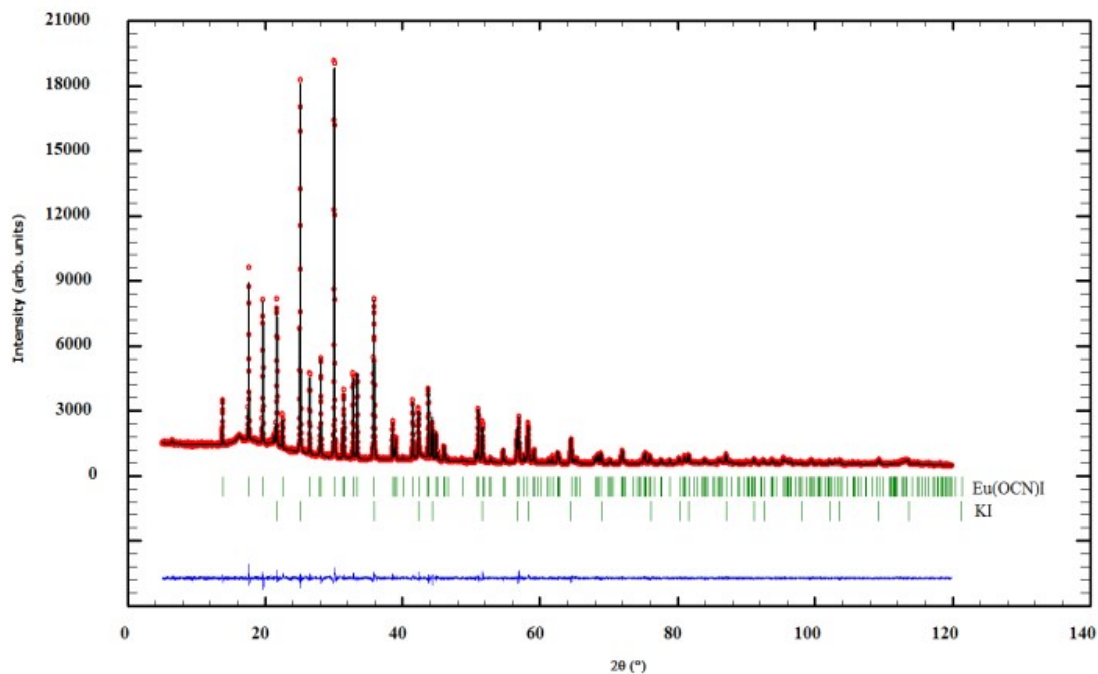

**Figure S4.** Crystal structure refinement plot of Eu(OCN) based on X-ray powder pattern data. Green ticks mark Bragg reflections relative to Eu(OCN) and KI phase. The difference curve (blue) highlights the difference between observed (red) and calculated pattern (black).

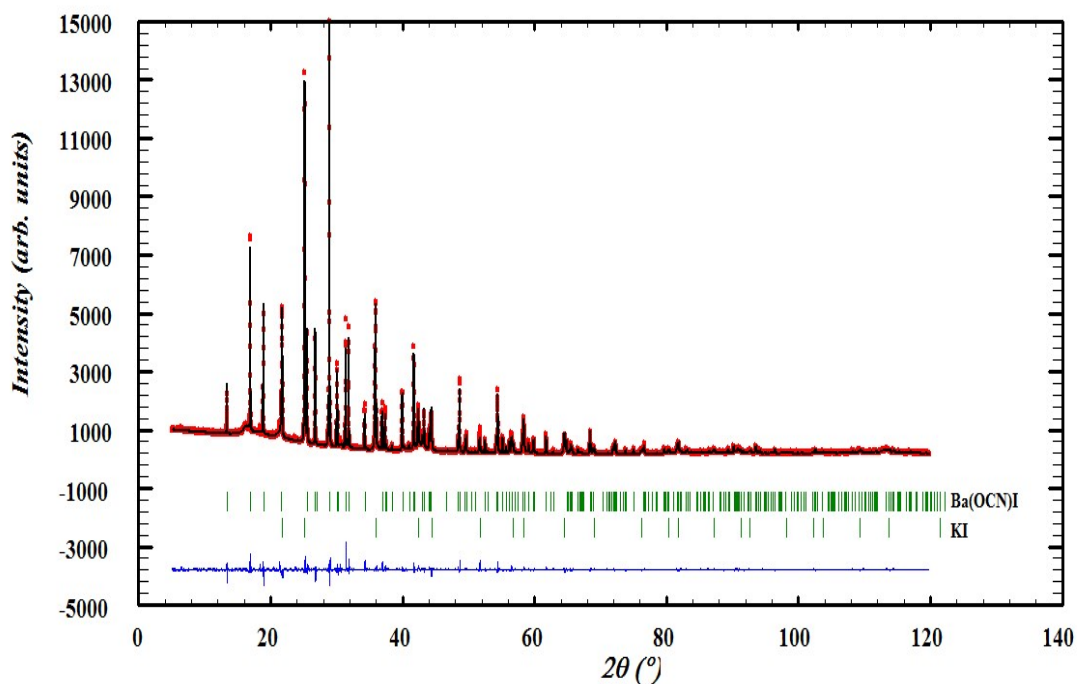

**Figure S5.** Crystal structure refinement plot of BaI(OCN) based on X-ray powder pattern data. Green ticks mark Bragg reflections relative to Ba(OCN)I and KI phase. The difference curve (blue) highlights the difference between observed (red) and calculated pattern (black).

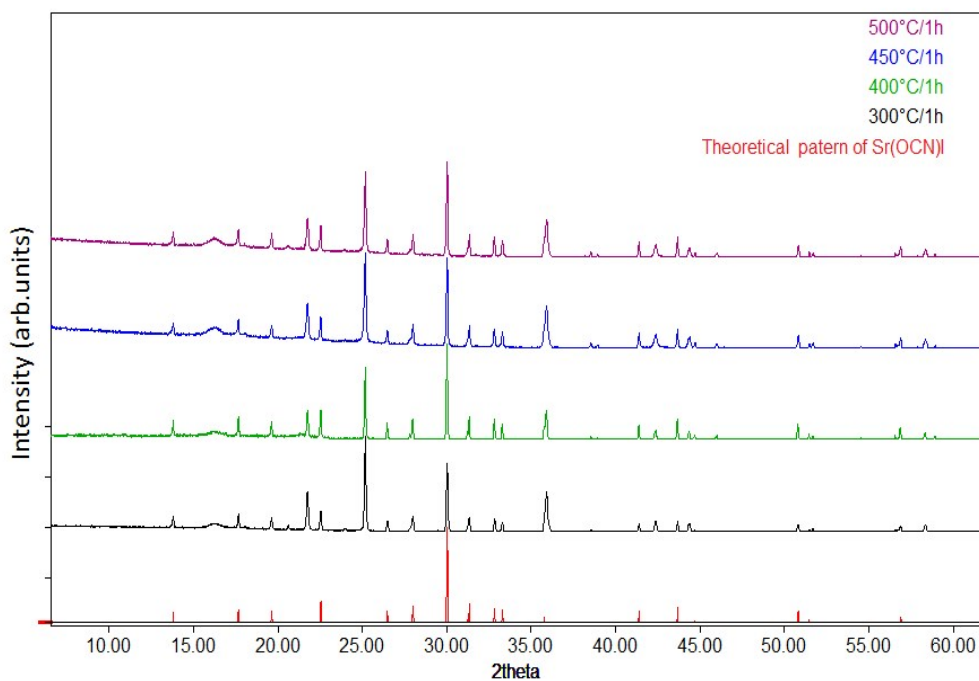

**Figure S6.** Powder X-ray patterns of the products obtained at different temperatures of solid-state reaction of  $\text{SrI}_2$  with KO CN (1:1).

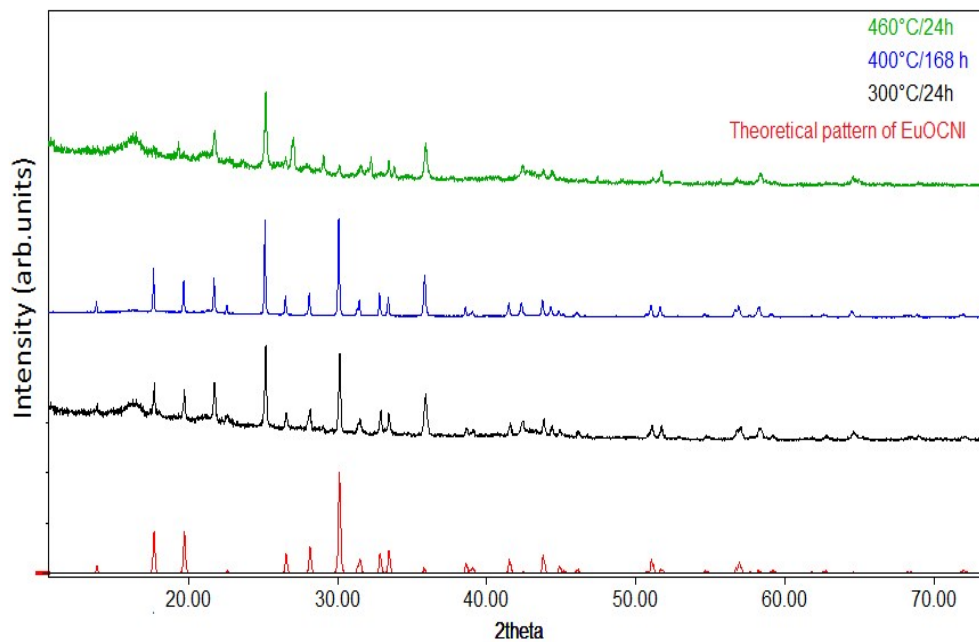

**Figure S7.** Powder X-ray patterns of the products obtained at different temperatures of solid-state reaction of  $\text{EuI}_2$  with  $\text{KOCN}$  (1:1).

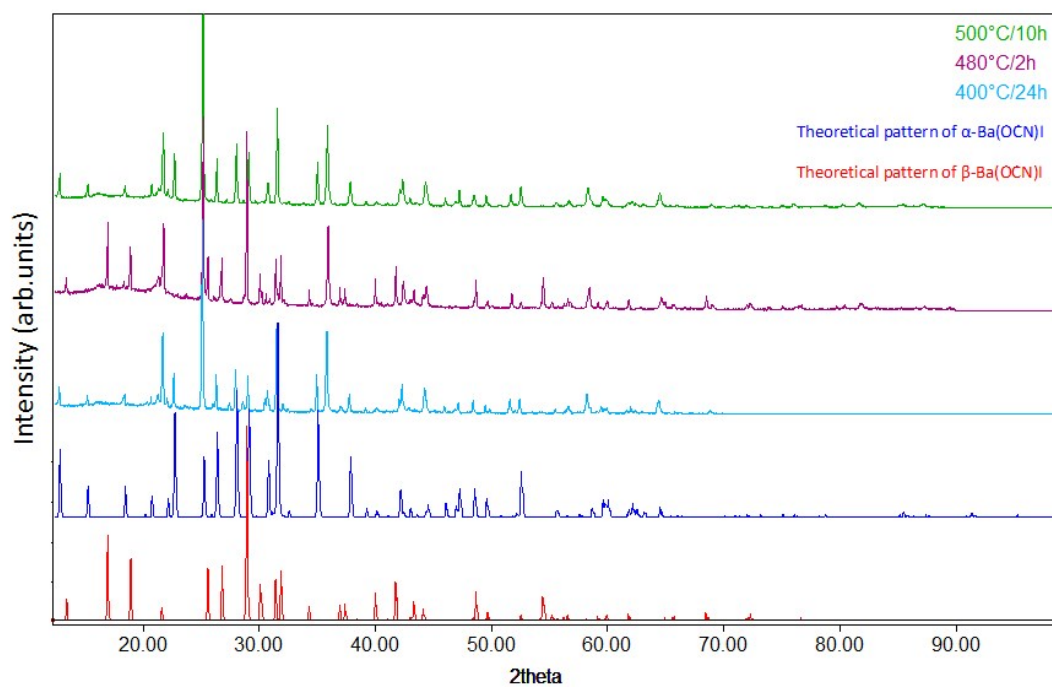

**Figure S8.** Powder X-ray patterns of the products obtained at different temperatures of solid-state reaction of  $\text{BaI}_2$  with  $\text{KOCN}$  (1:1).

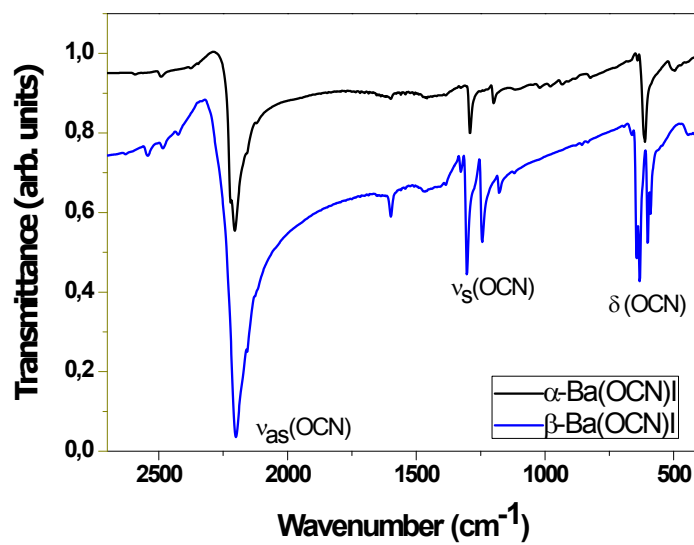

Figure S9. FTIR spectra of  $\alpha$ -Ba(OCN) (SG: *Pnma*) and  $\beta$ -Ba(OCN) (SG: *Cmcm*) compounds.

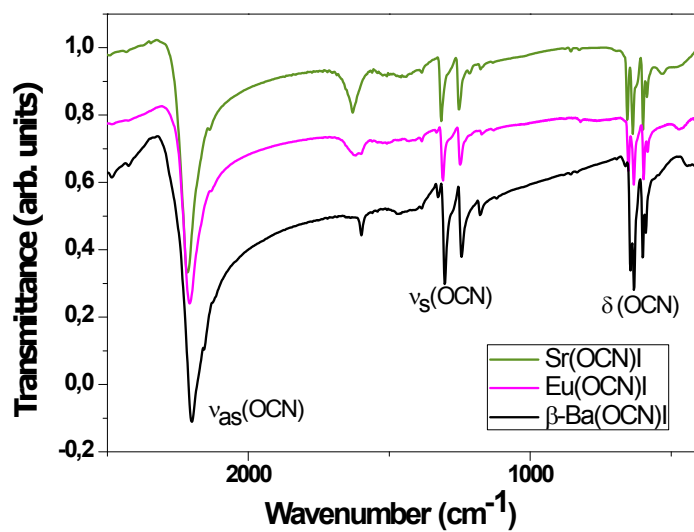

Figure S10. Fourier transform infrared spectrum of MI(OCN) compounds.

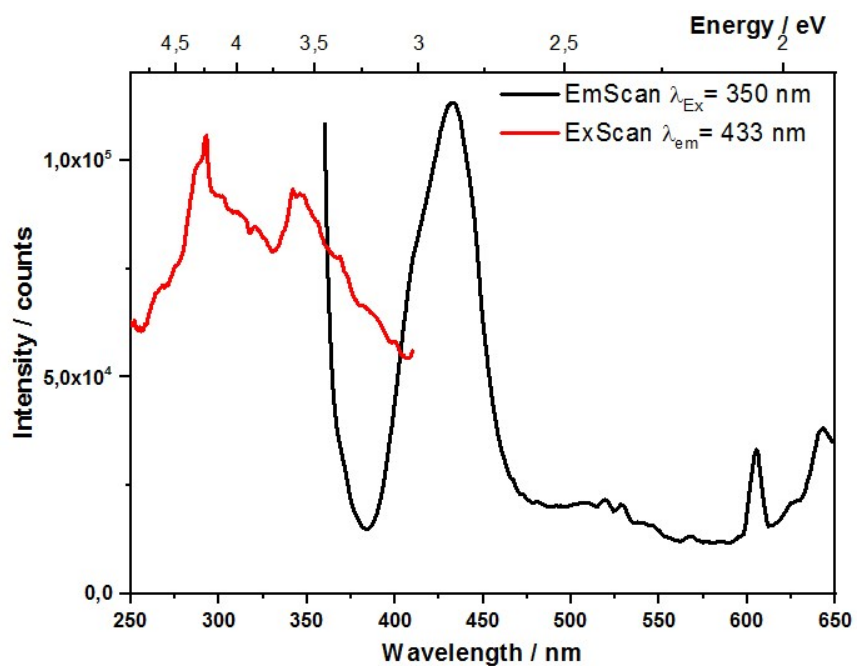

**Figure S11.** Excitation (red) and emission spectra (black) of  $\text{Eu}^{2+}$  (2%)-doped  $\beta\text{-Ba}(\text{OCN})$  compound.

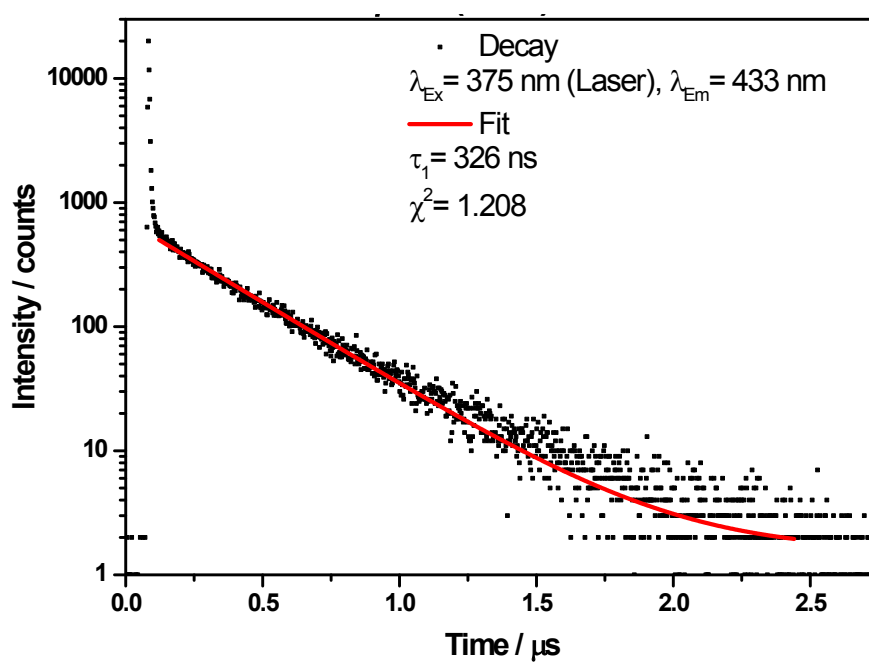

**Figure S12.** Decay curve of  $\beta\text{-Ba}(\text{OCN})\text{:Eu}^{2+}$  recorded for the europium blue transition at 431 nm.
