# Supplementary figures and images for: Structure, polymorphism and luminescence of cyanate iodides MI(OCN) (M = Ba, Eu, and Sr)
Source: Royal Society of Chemistry journal article supplement (doi:10.1039/d0dt02126a), 2020-01-01

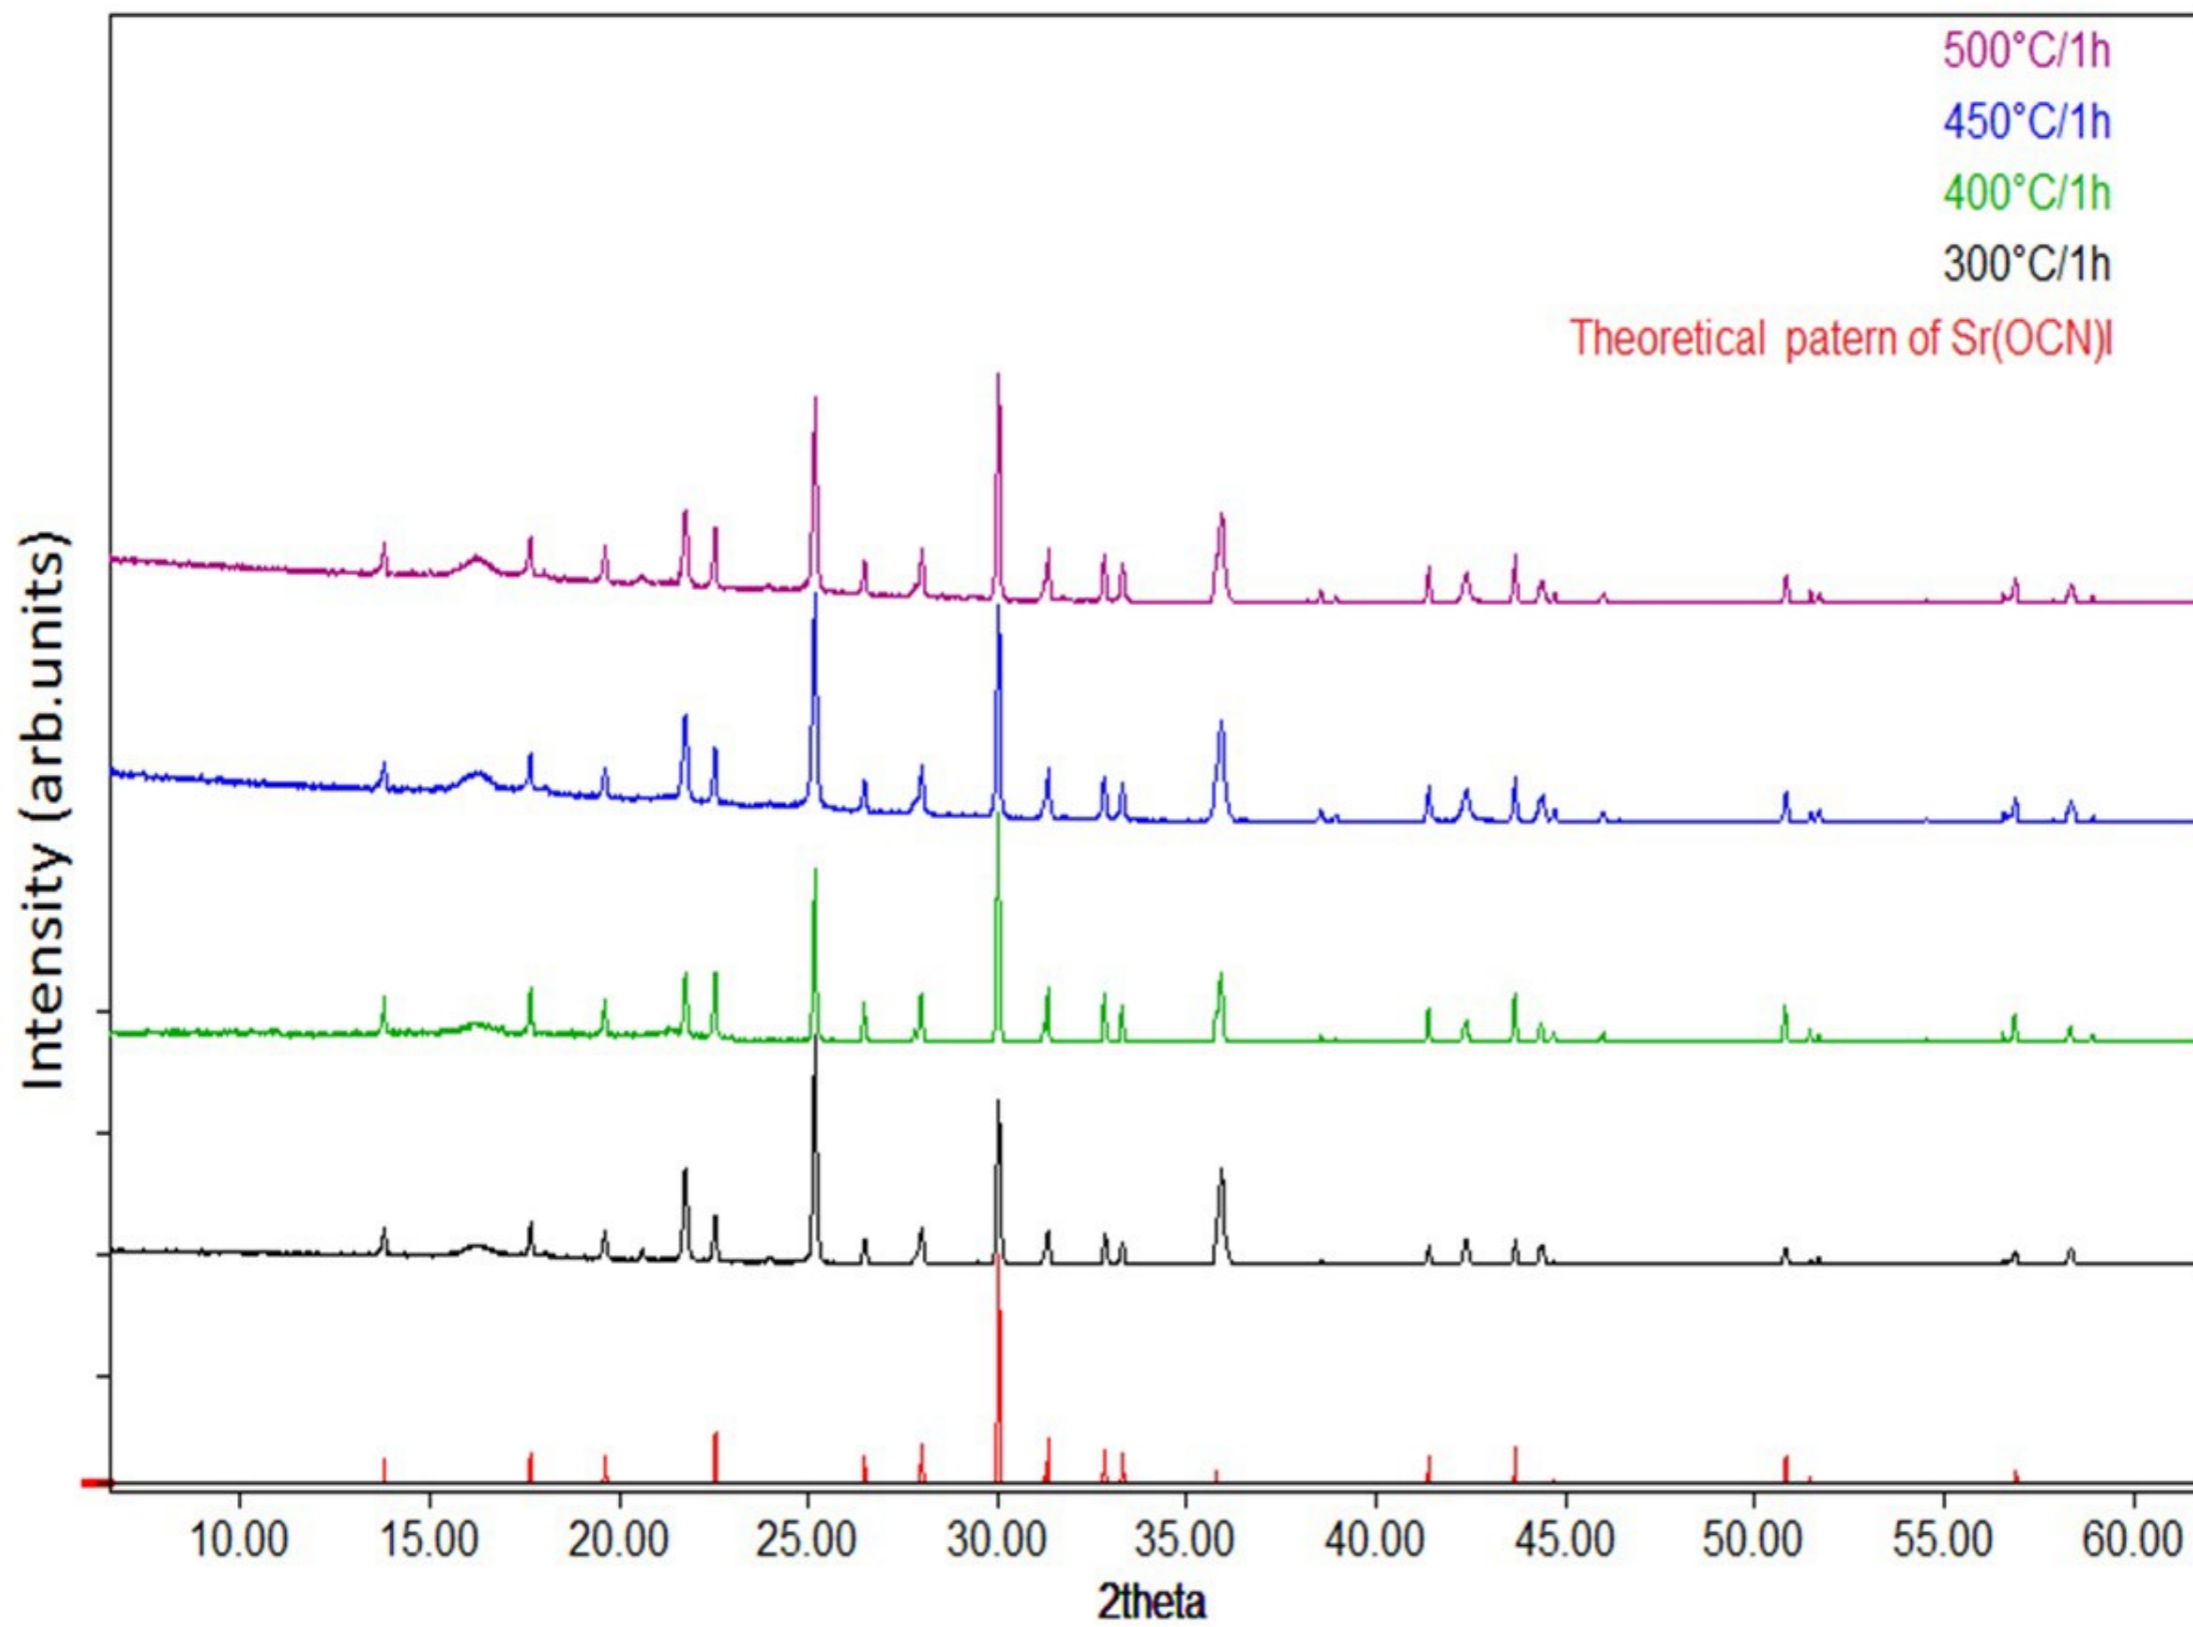

Supplement: d0dt02126a10.pdf [file d0dt02126a10.pdf]

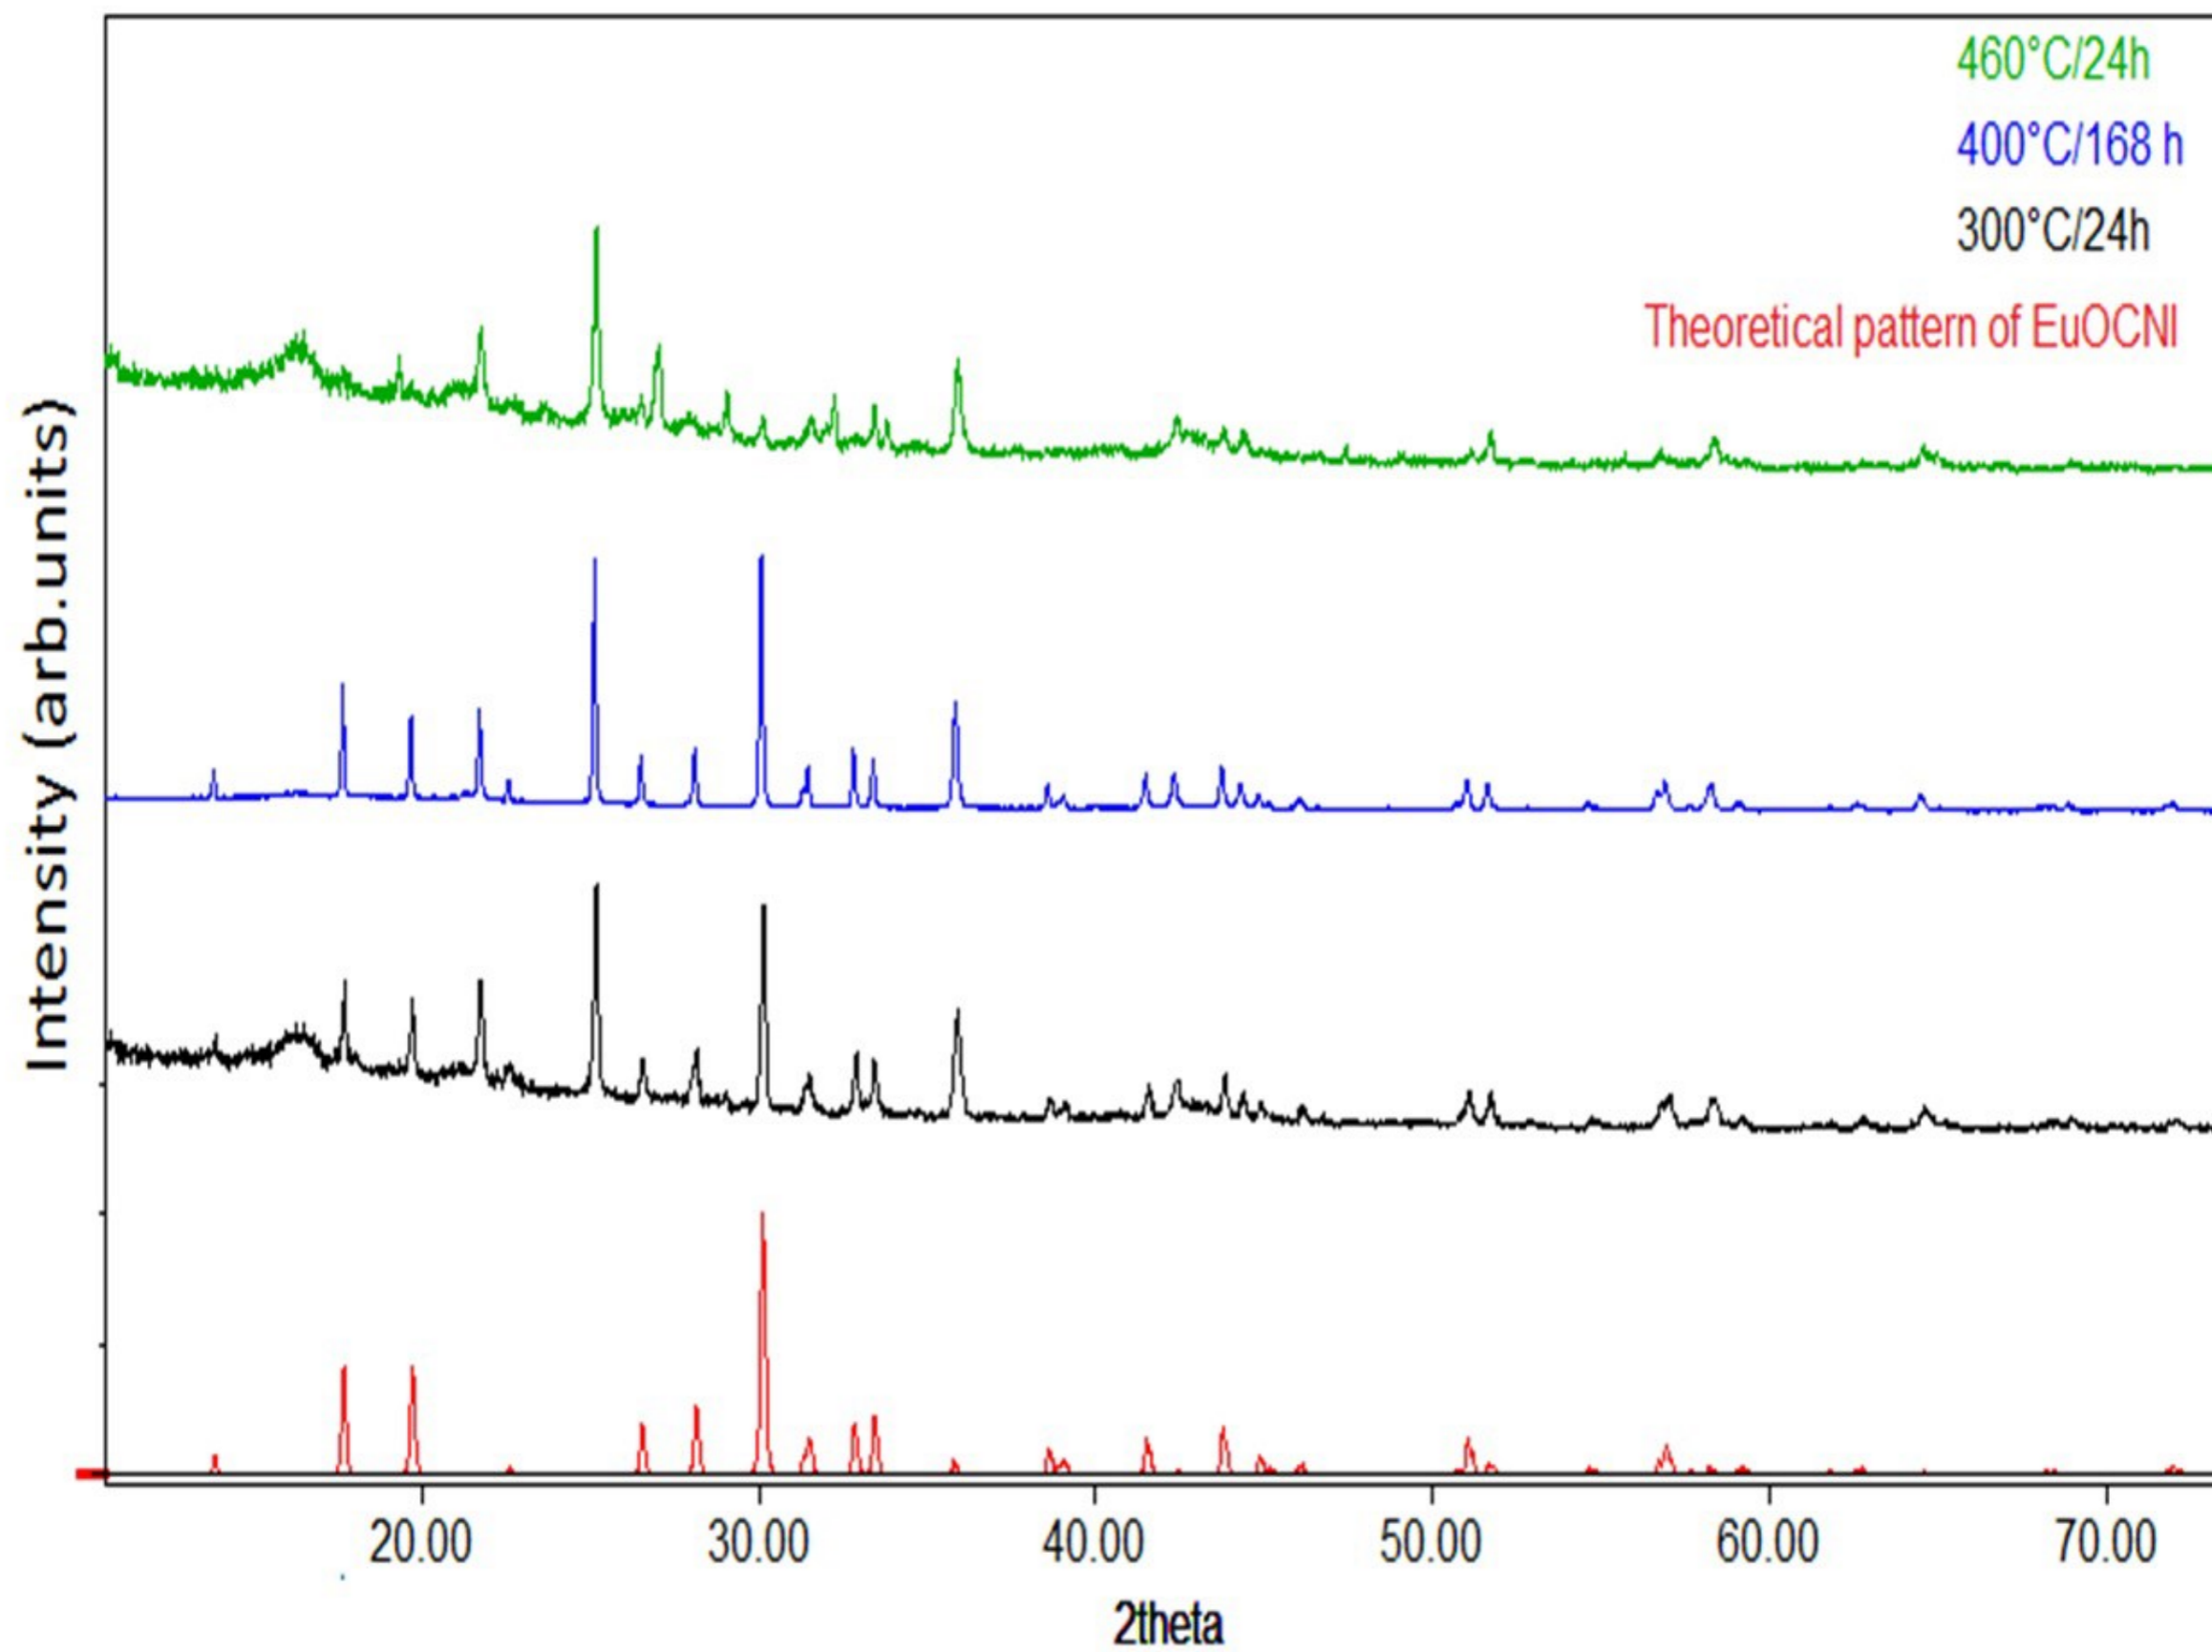

Supplement: d0dt02126a11.pdf [file d0dt02126a11.pdf]

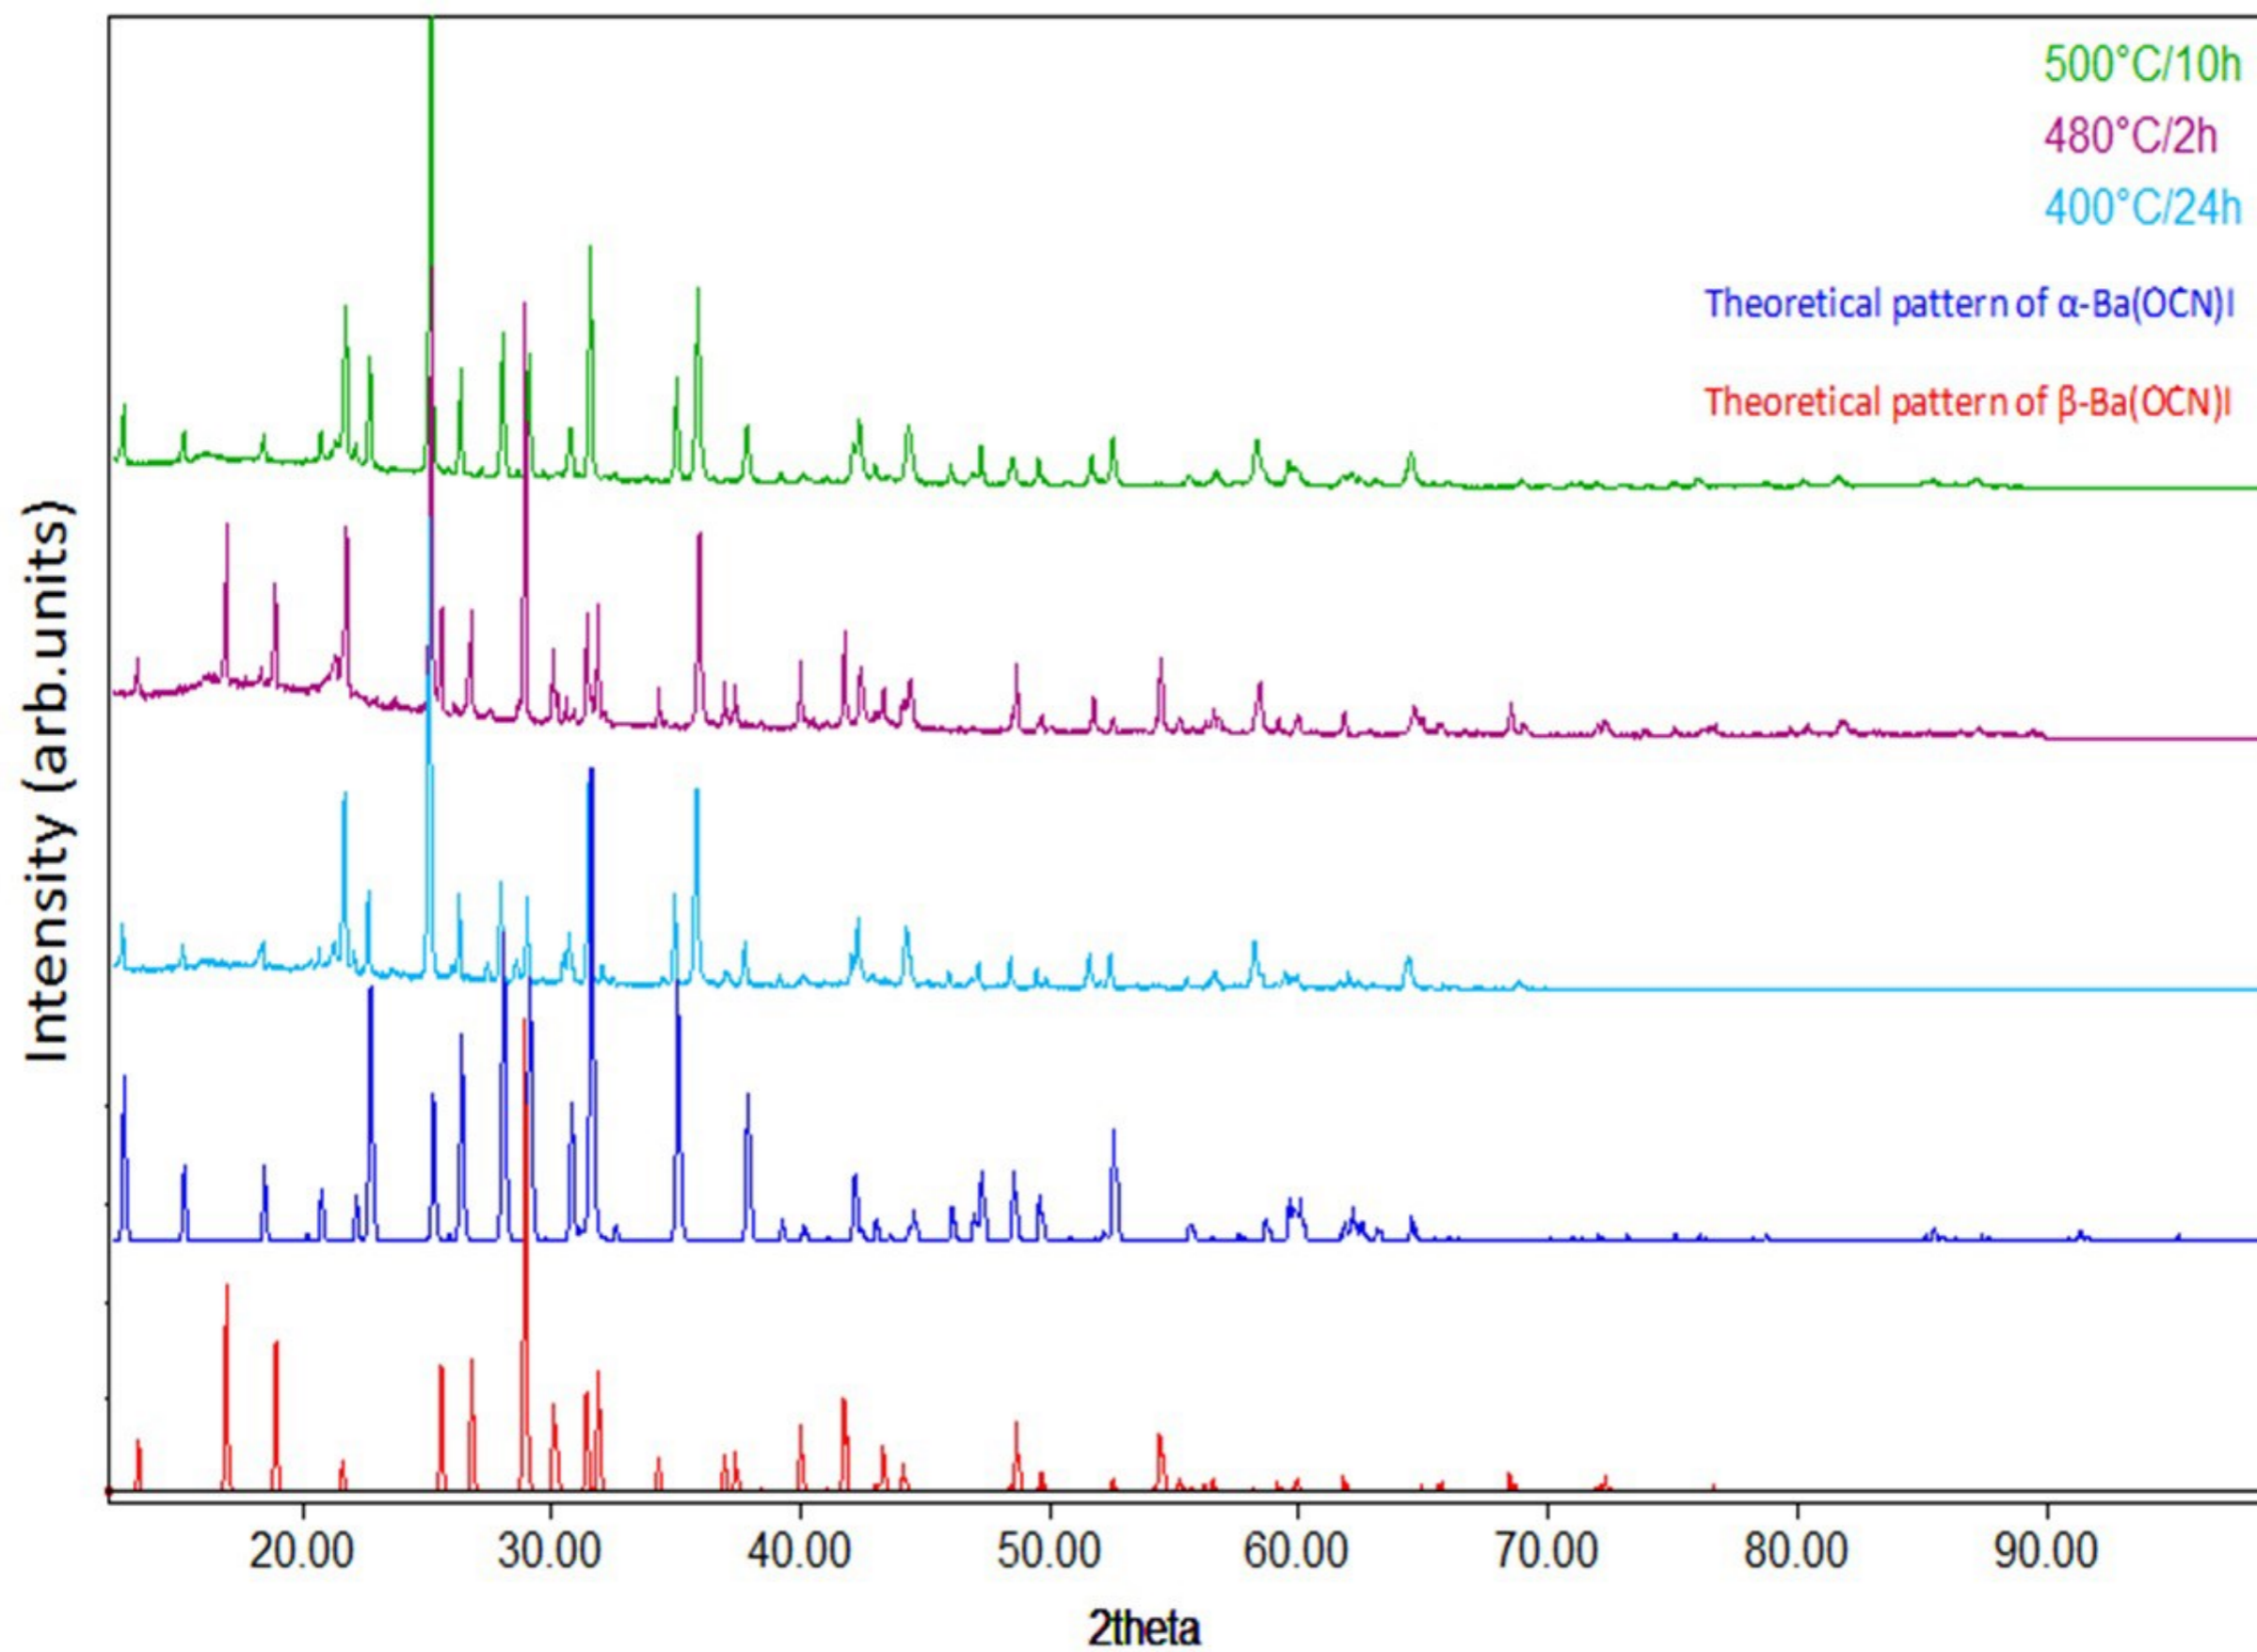

Supplement: d0dt02126a12.pdf [file d0dt02126a12.pdf]

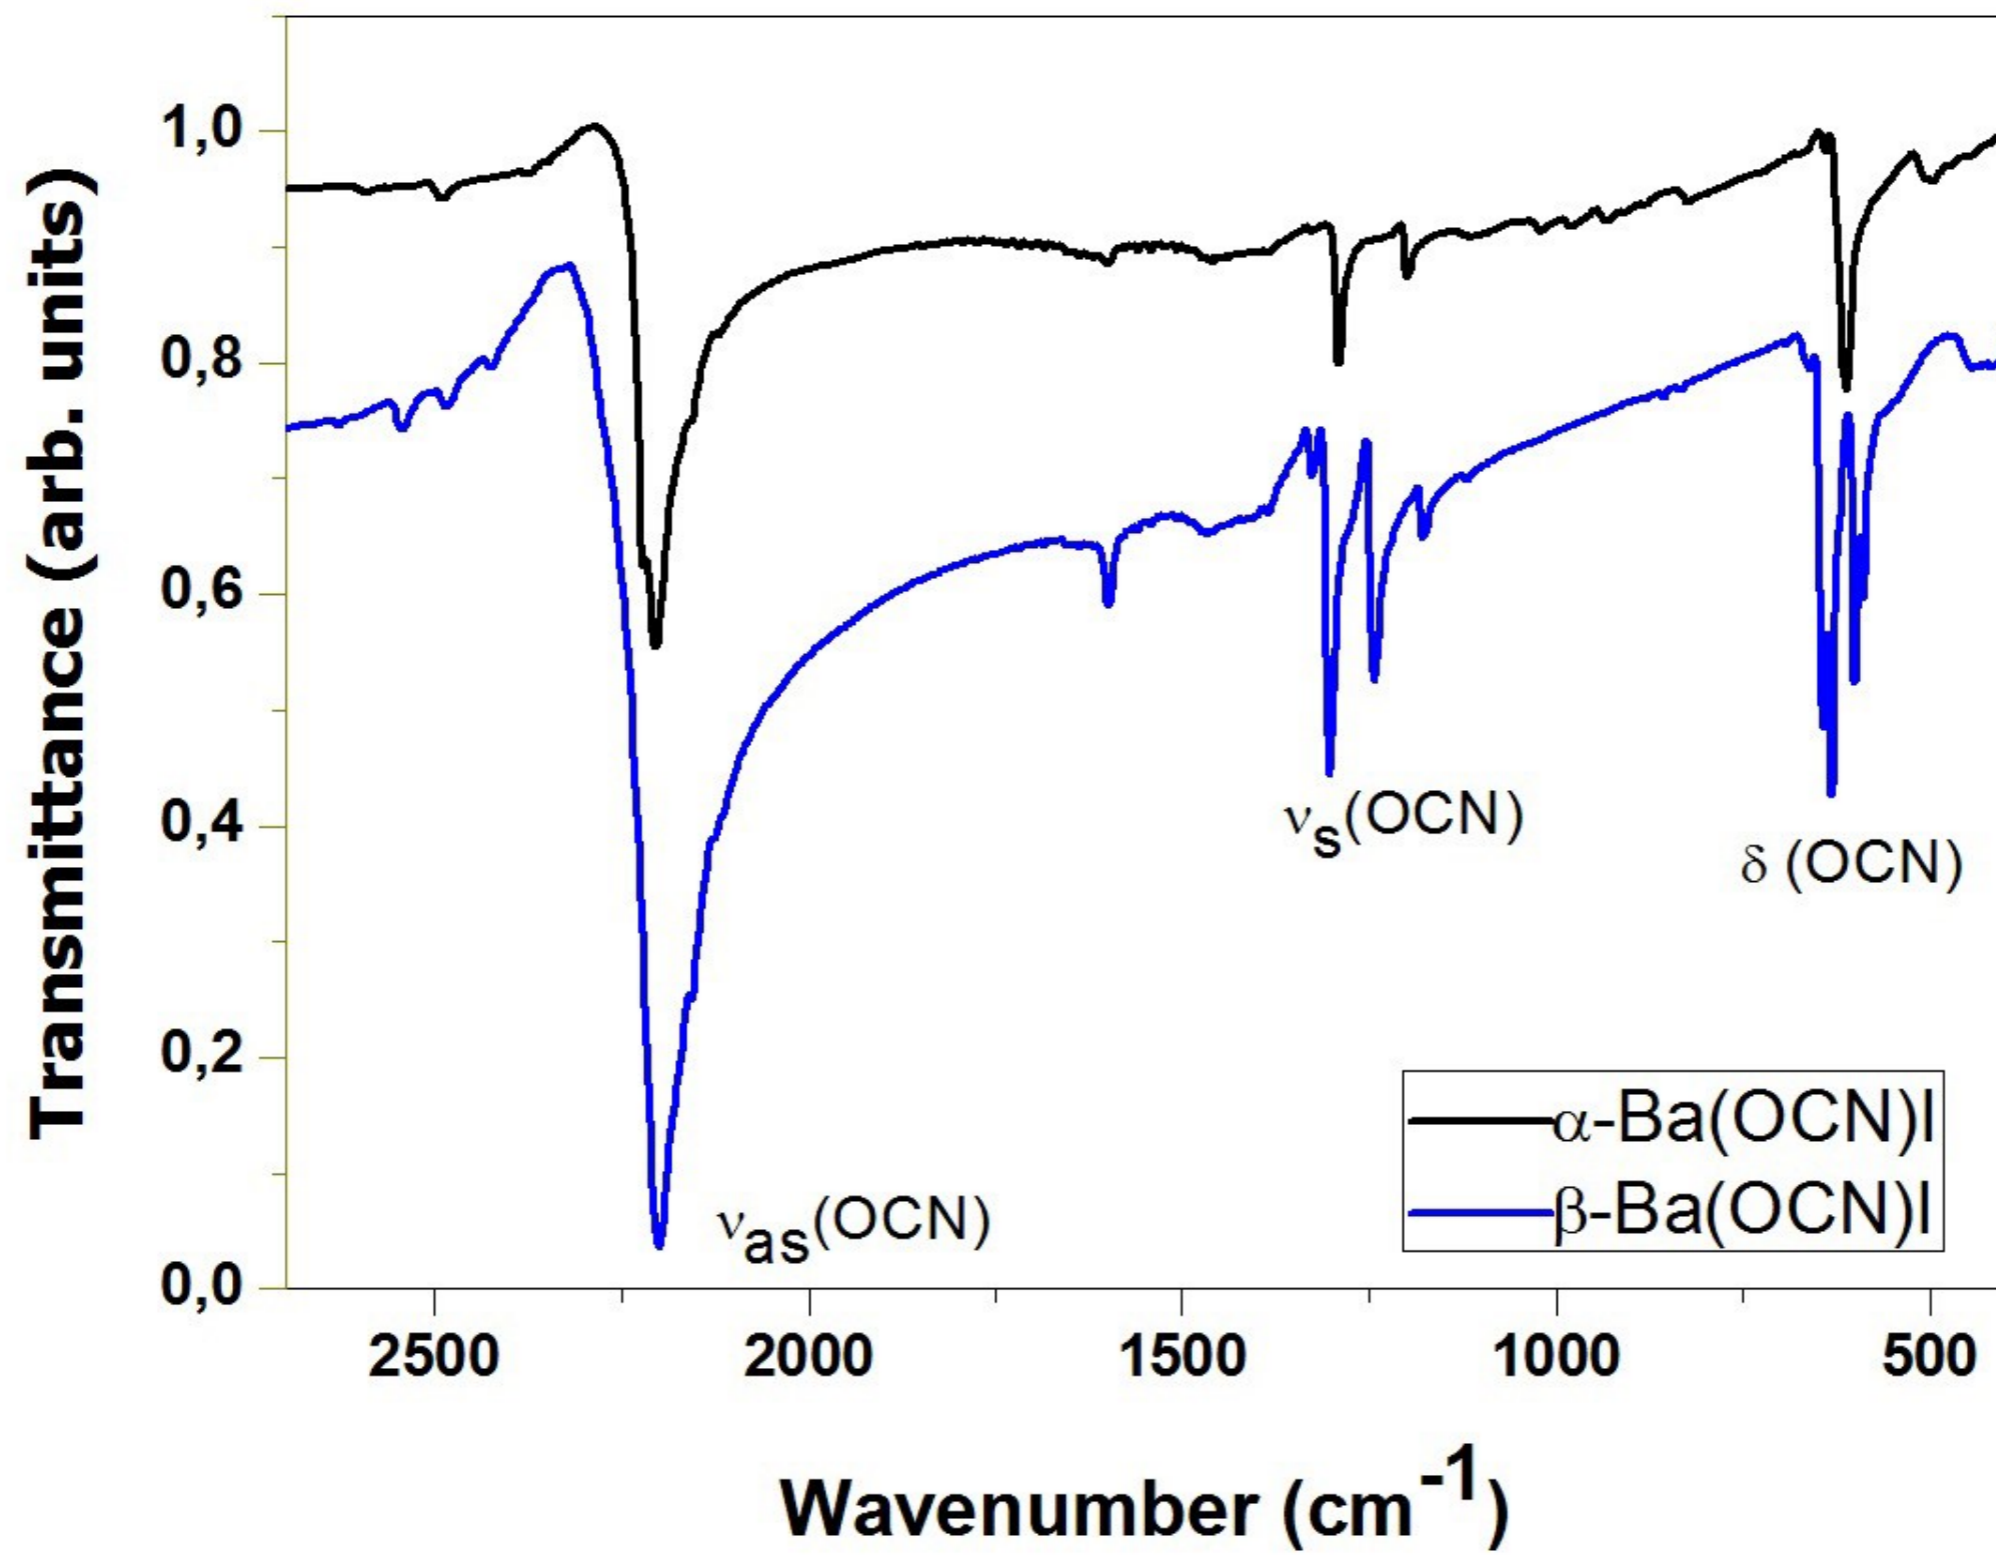

Supplement: d0dt02126a13.pdf [file d0dt02126a13.pdf]

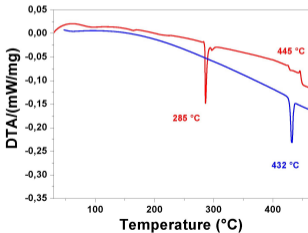

Supplement: d0dt02126a2.pdf [file d0dt02126a2.pdf]

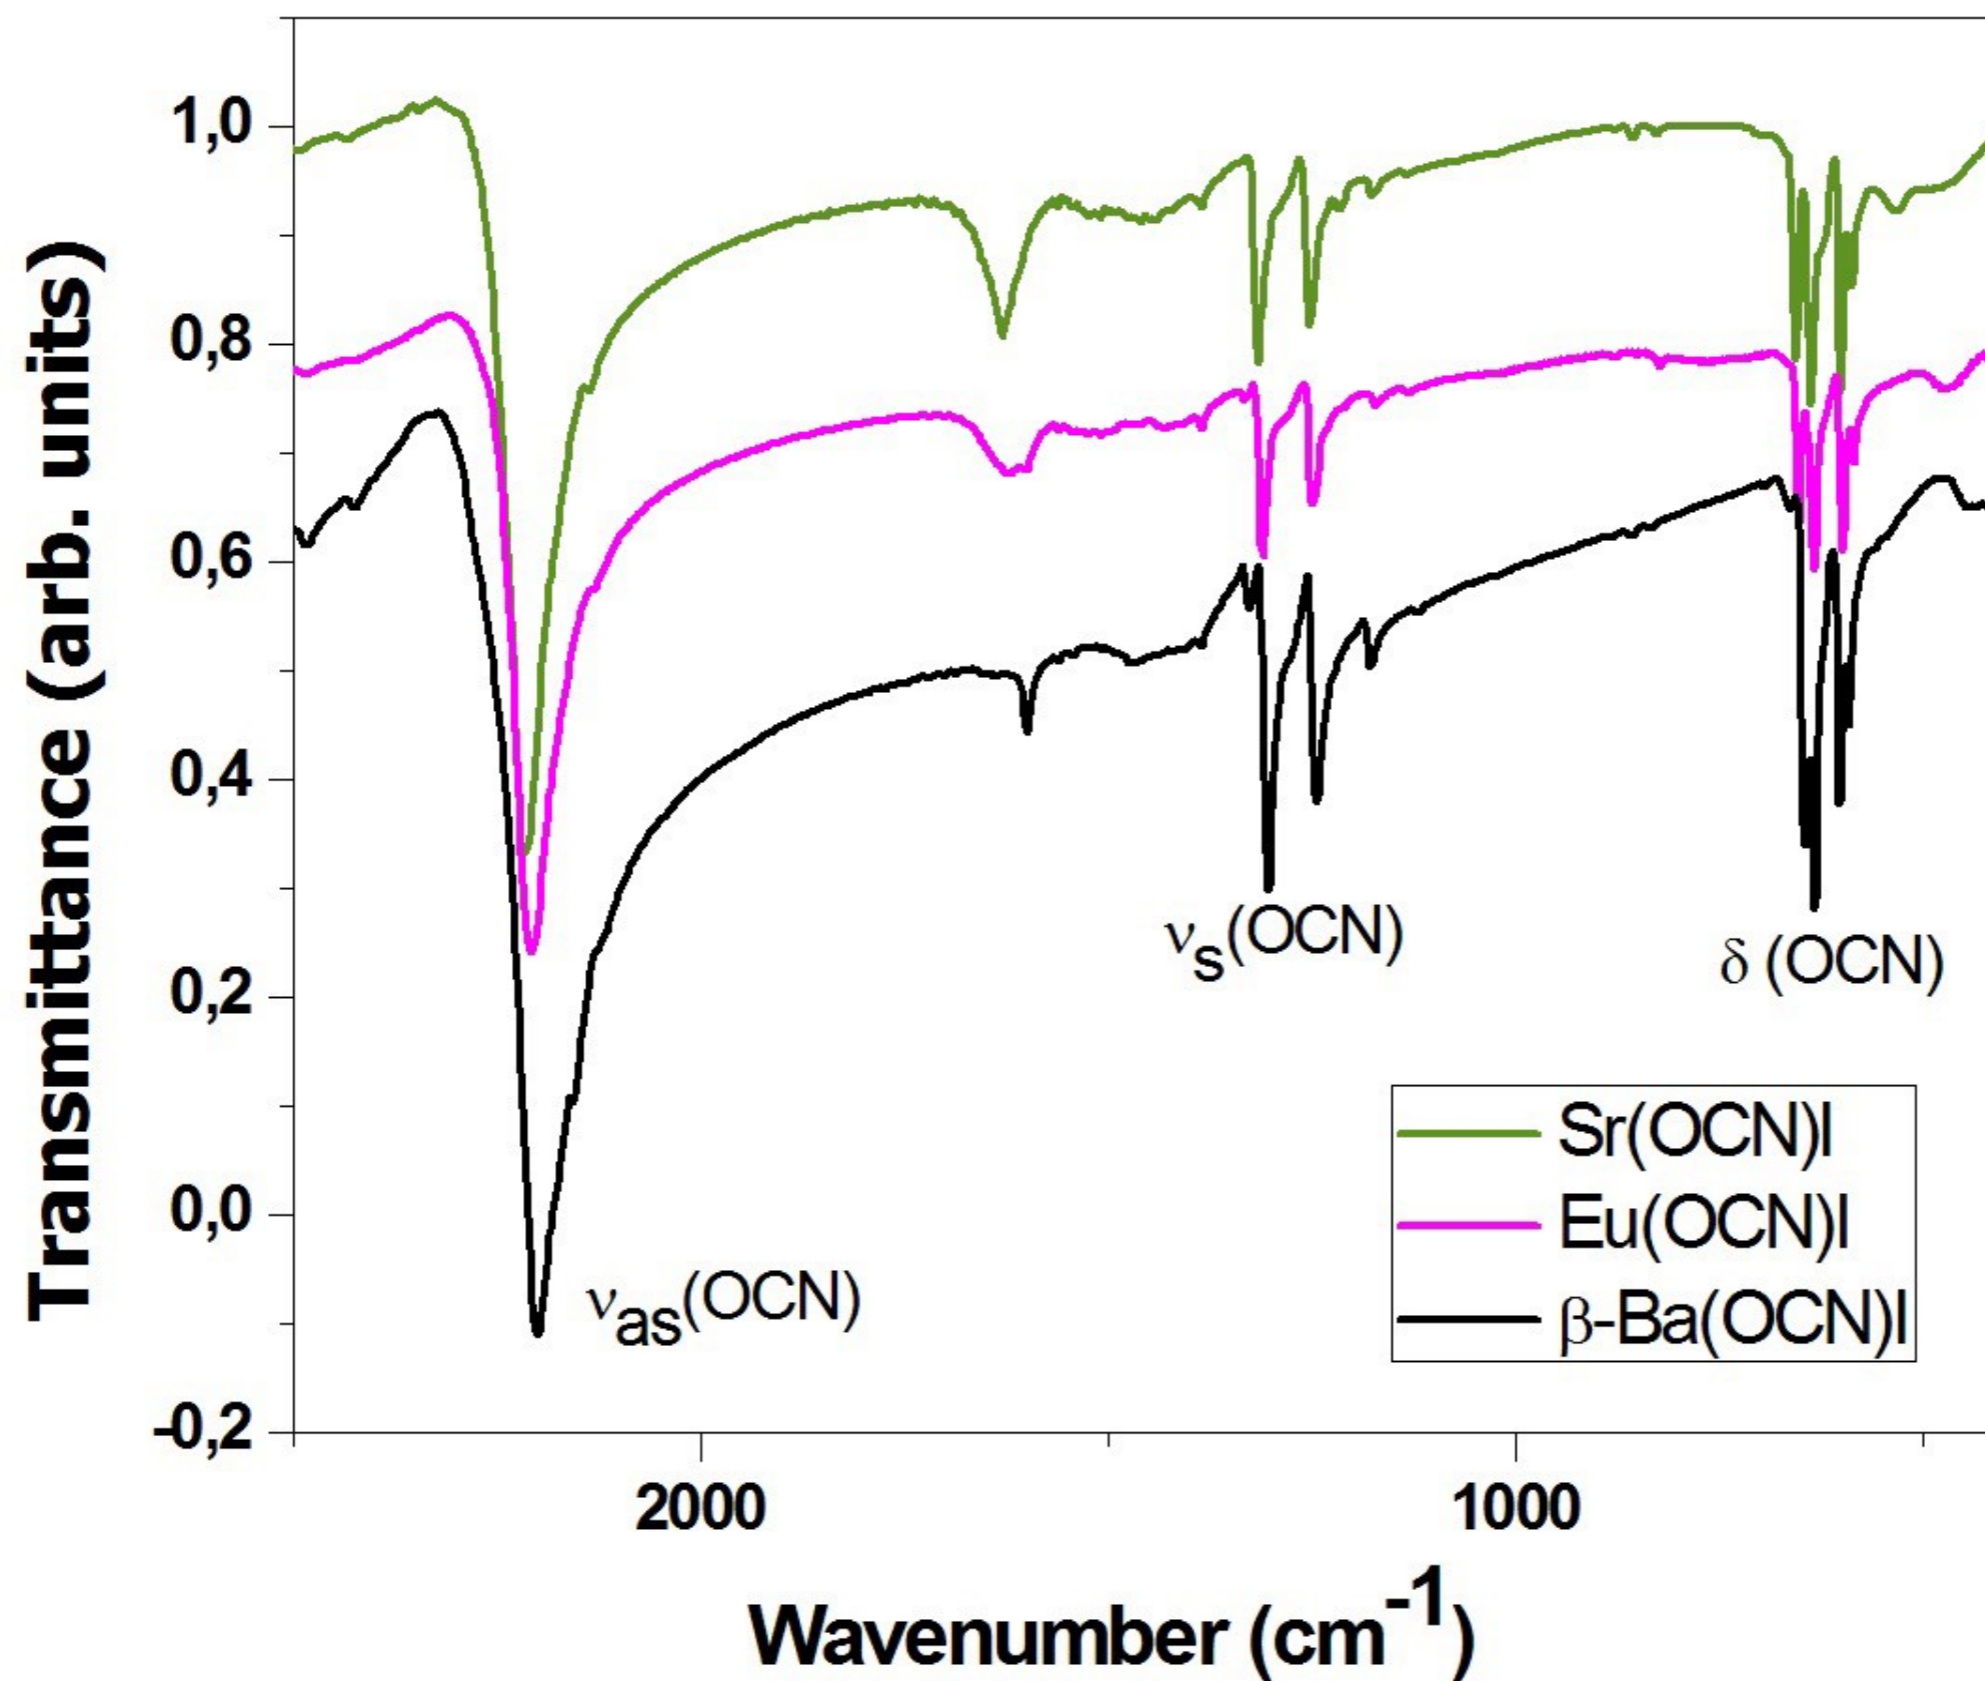

Supplement: d0dt02126a3.pdf [file d0dt02126a3.pdf]

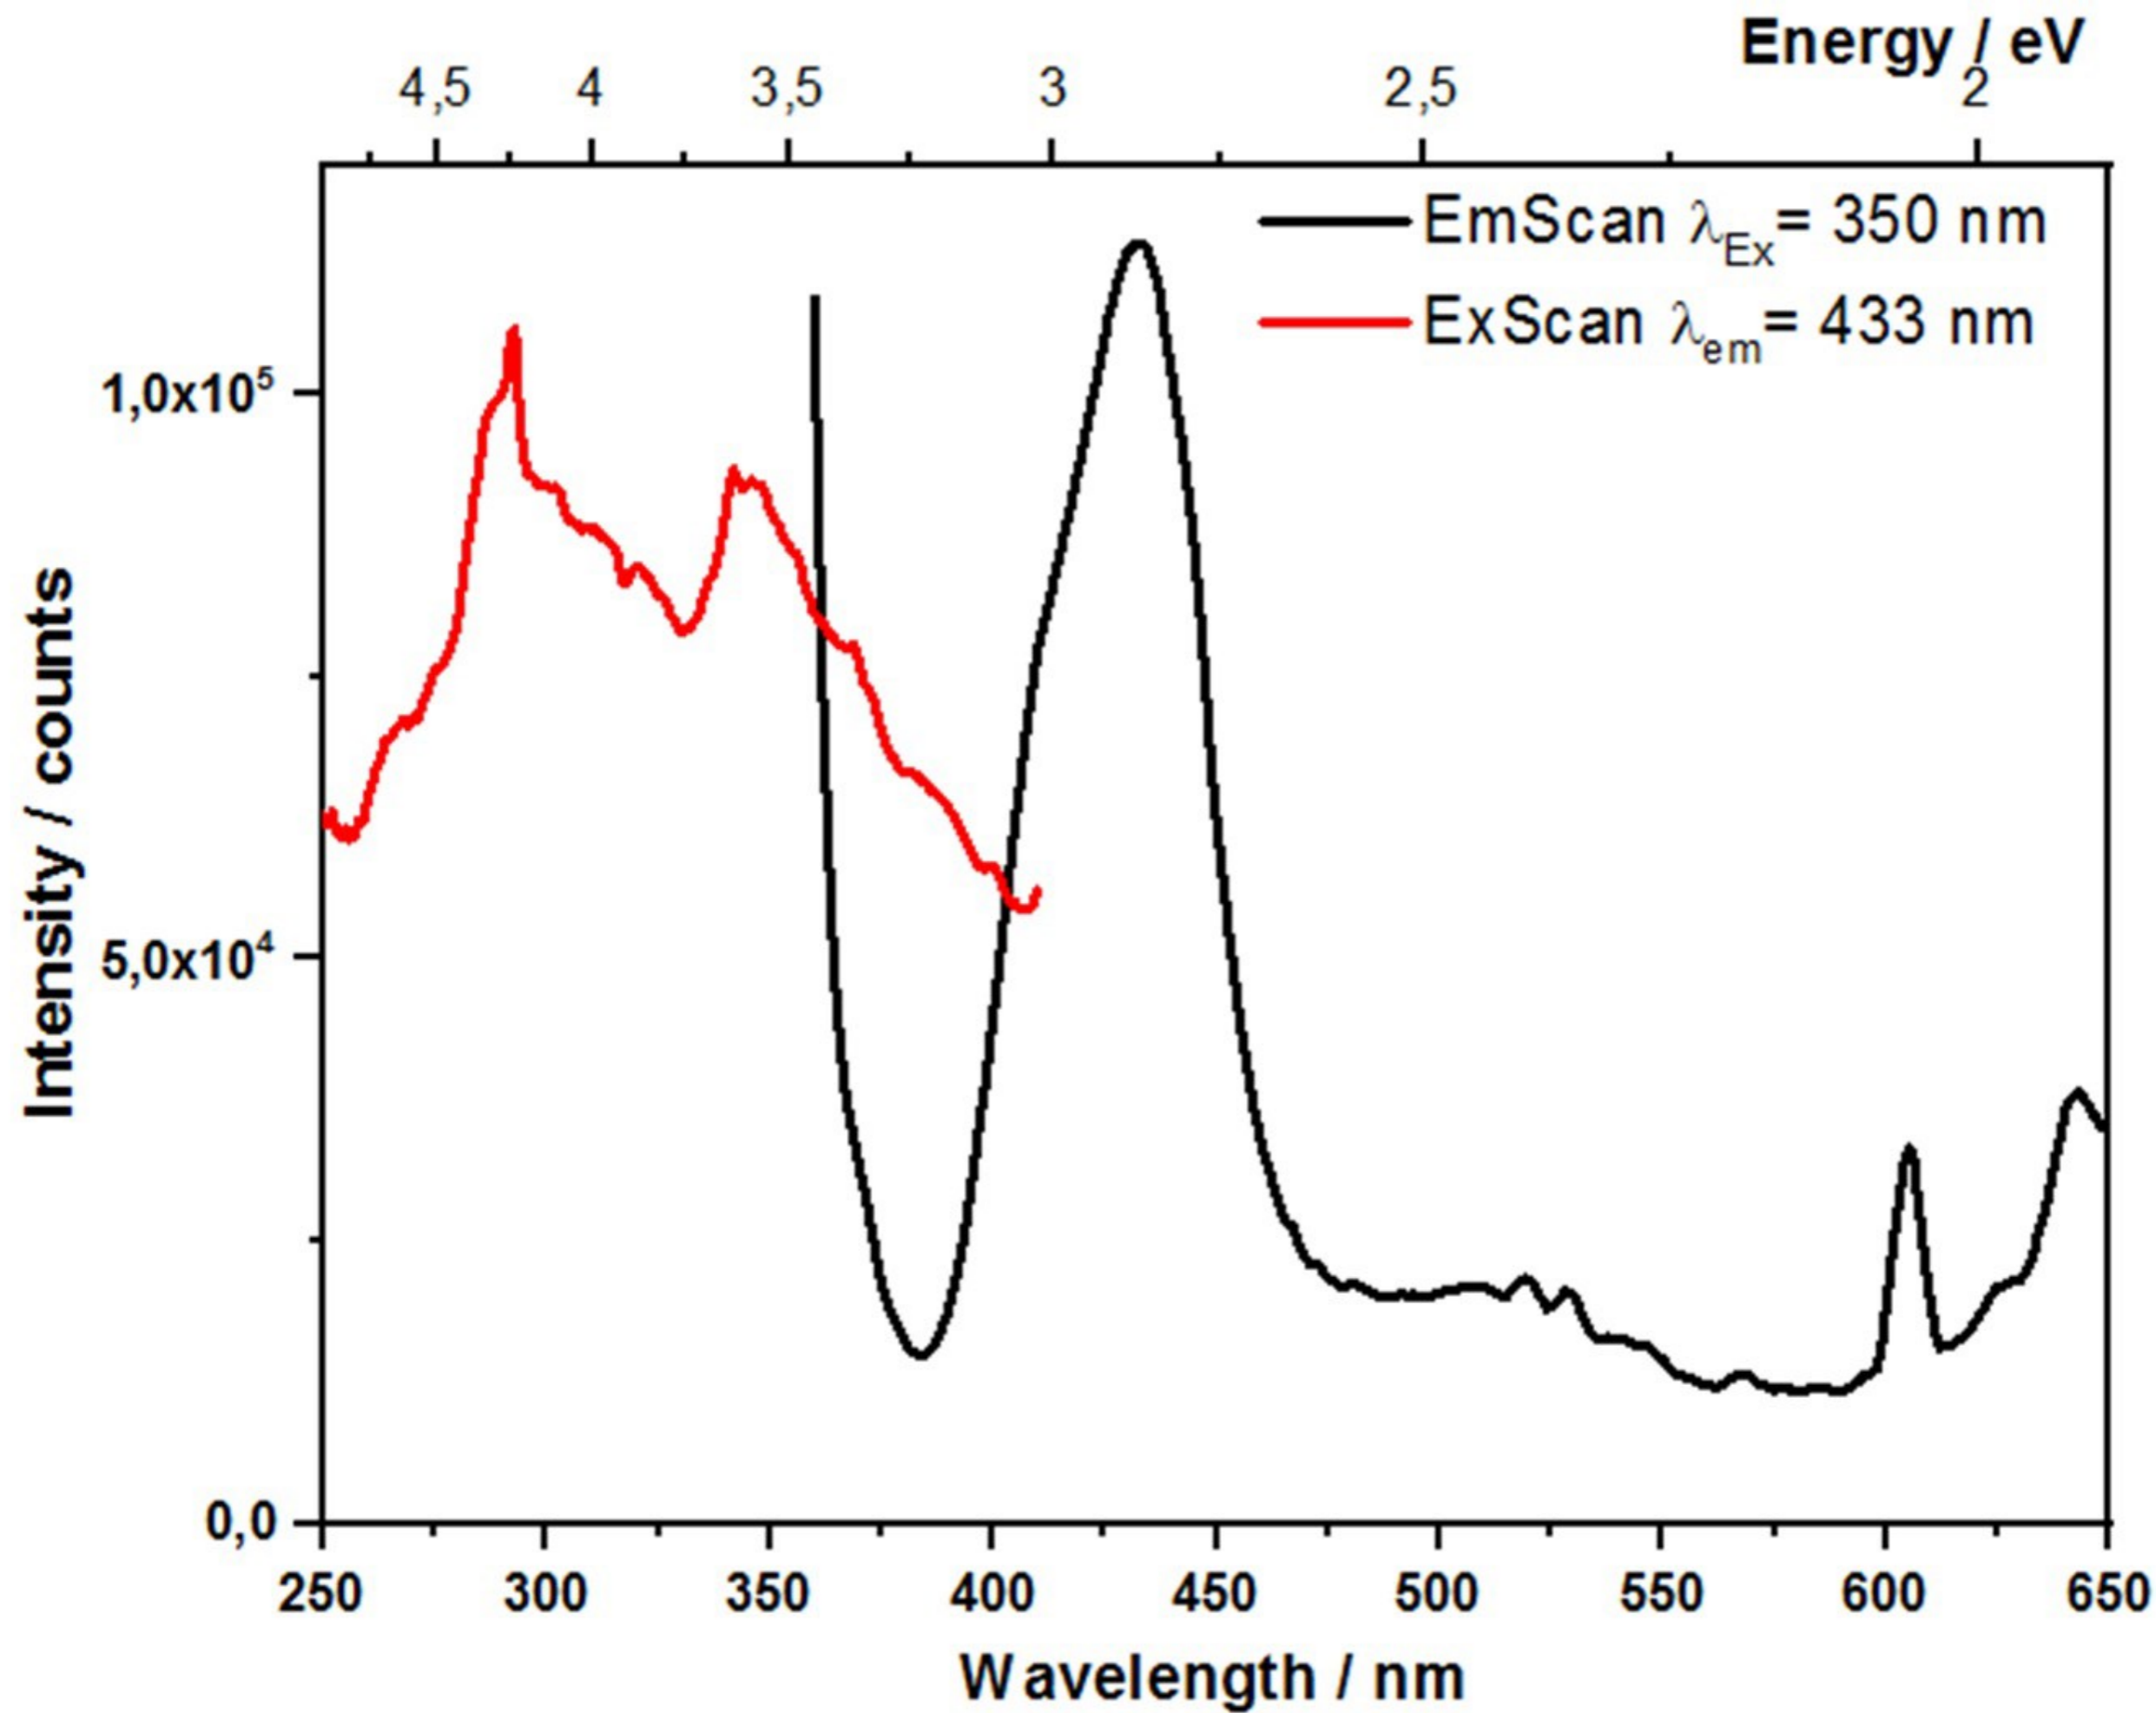

Supplement: d0dt02126a4.pdf [file d0dt02126a4.pdf]

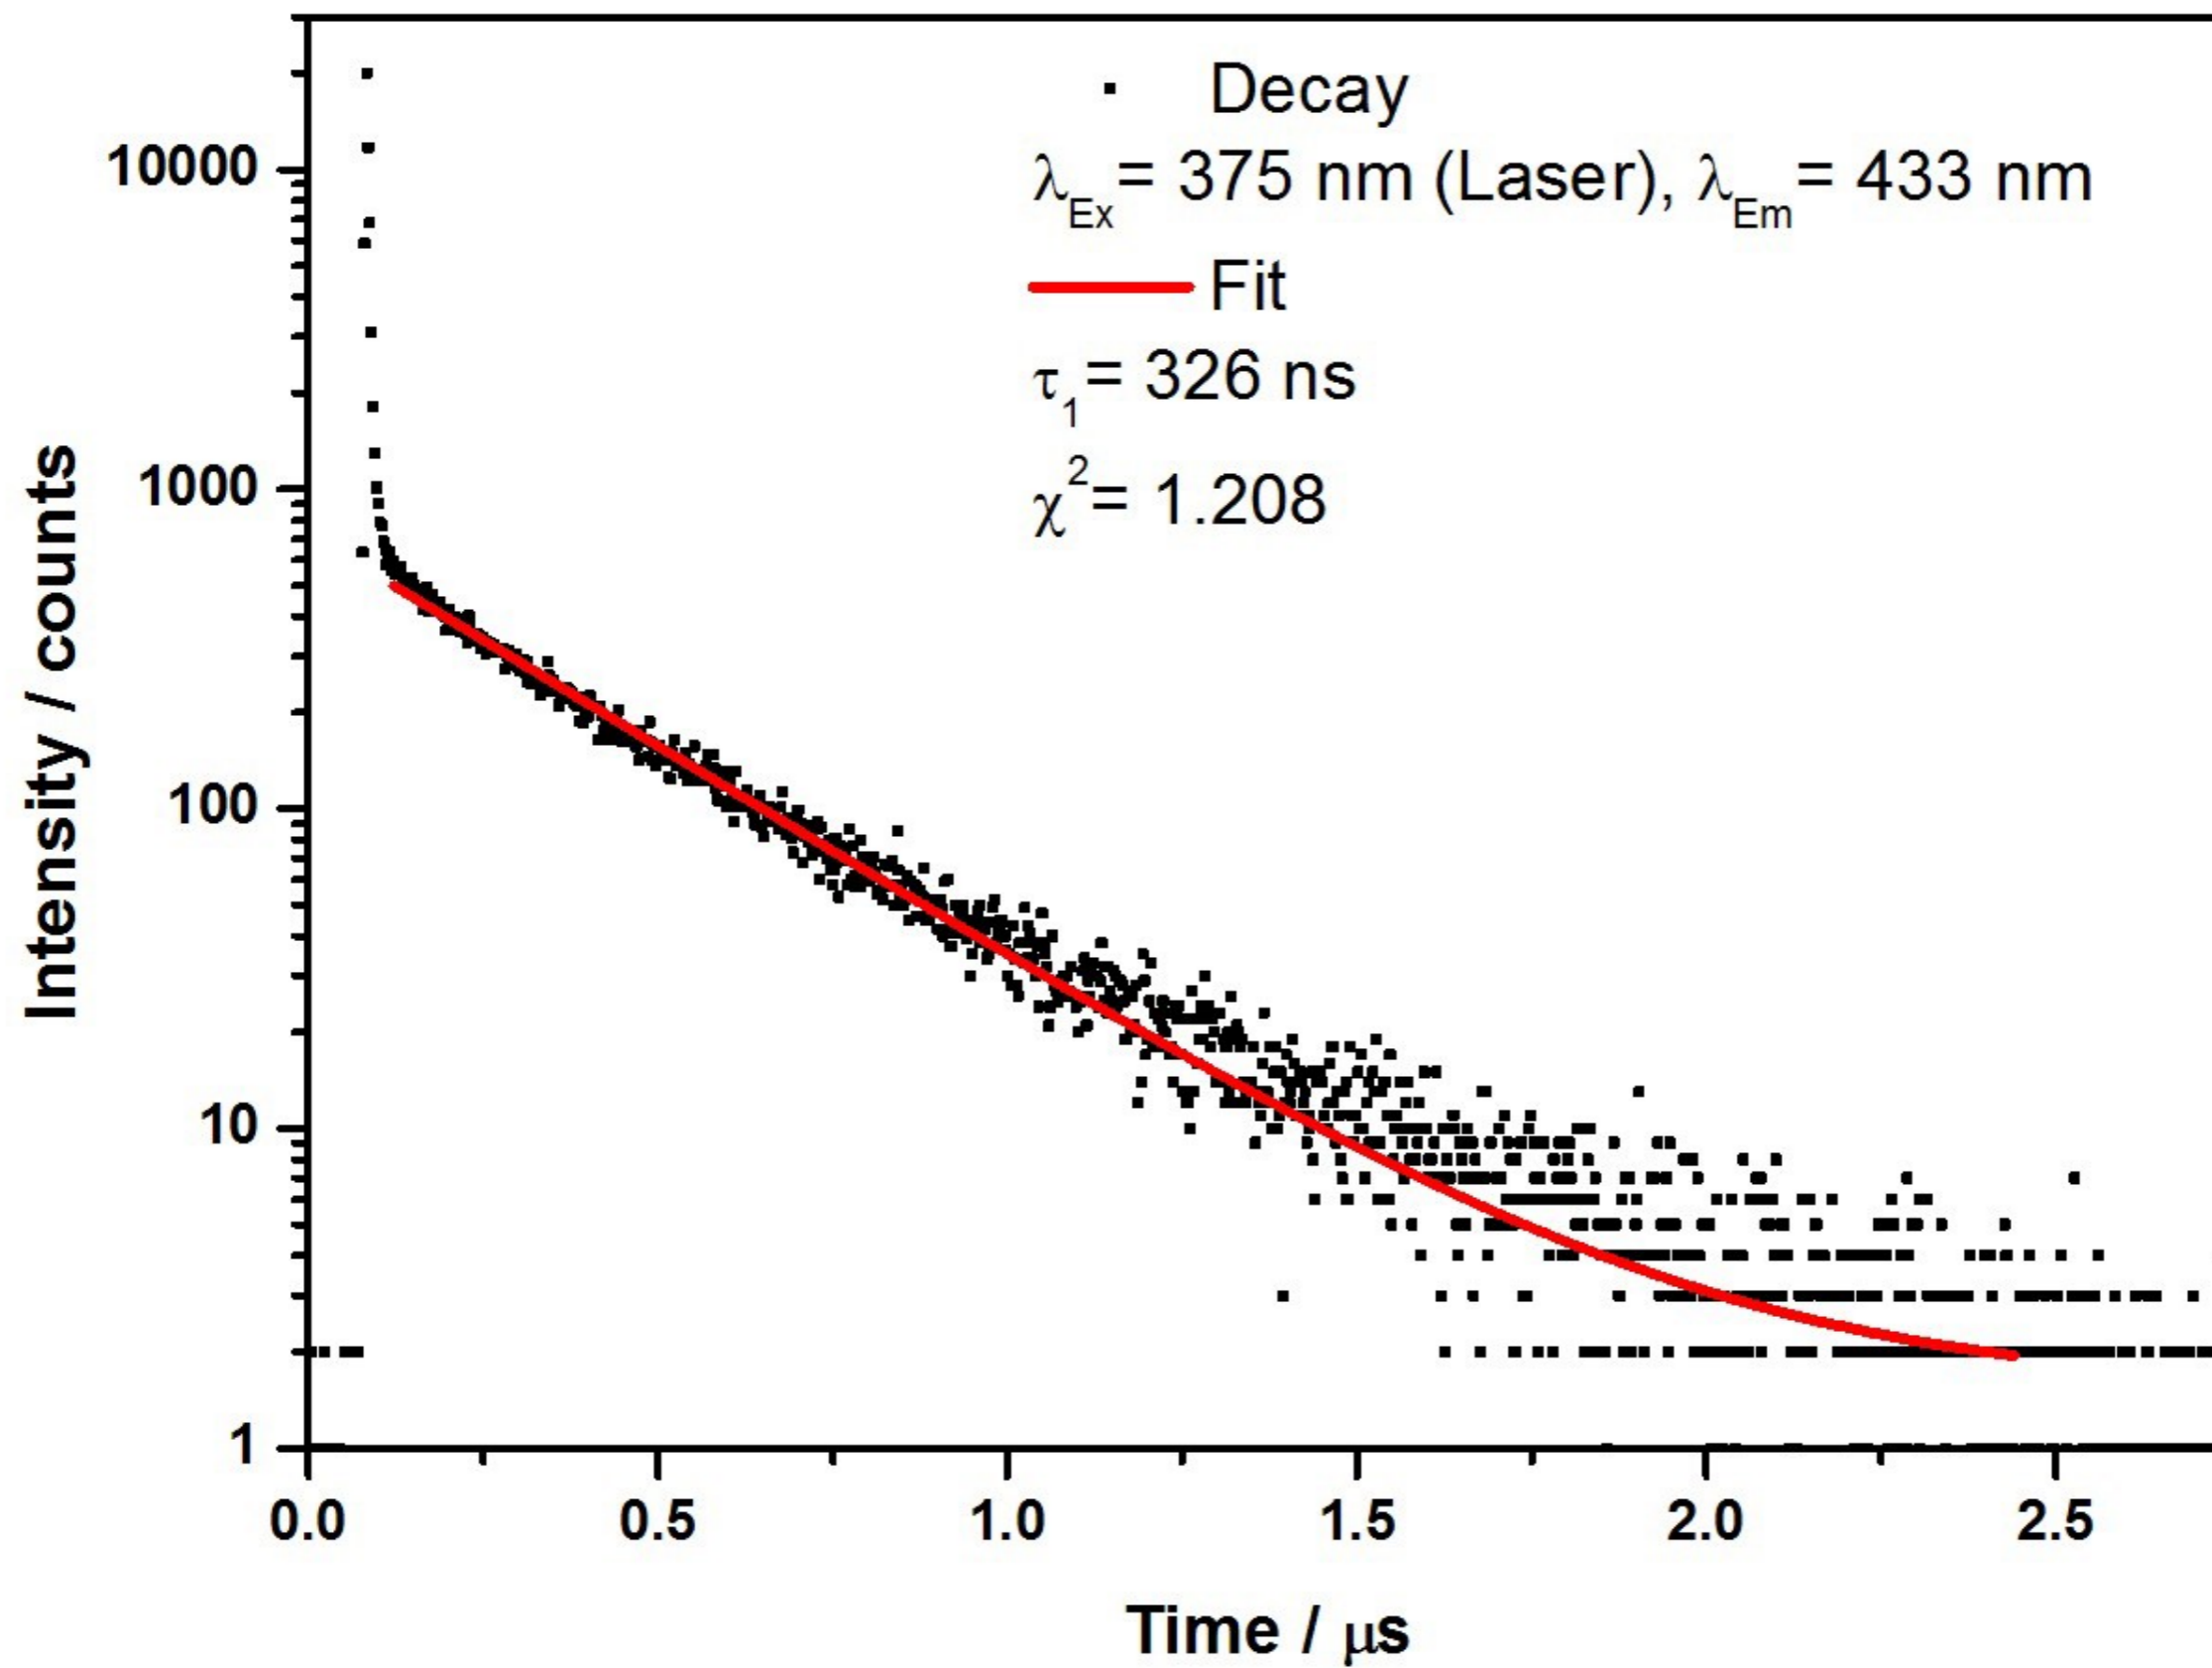

Supplement: d0dt02126a5.pdf [file d0dt02126a5.pdf]

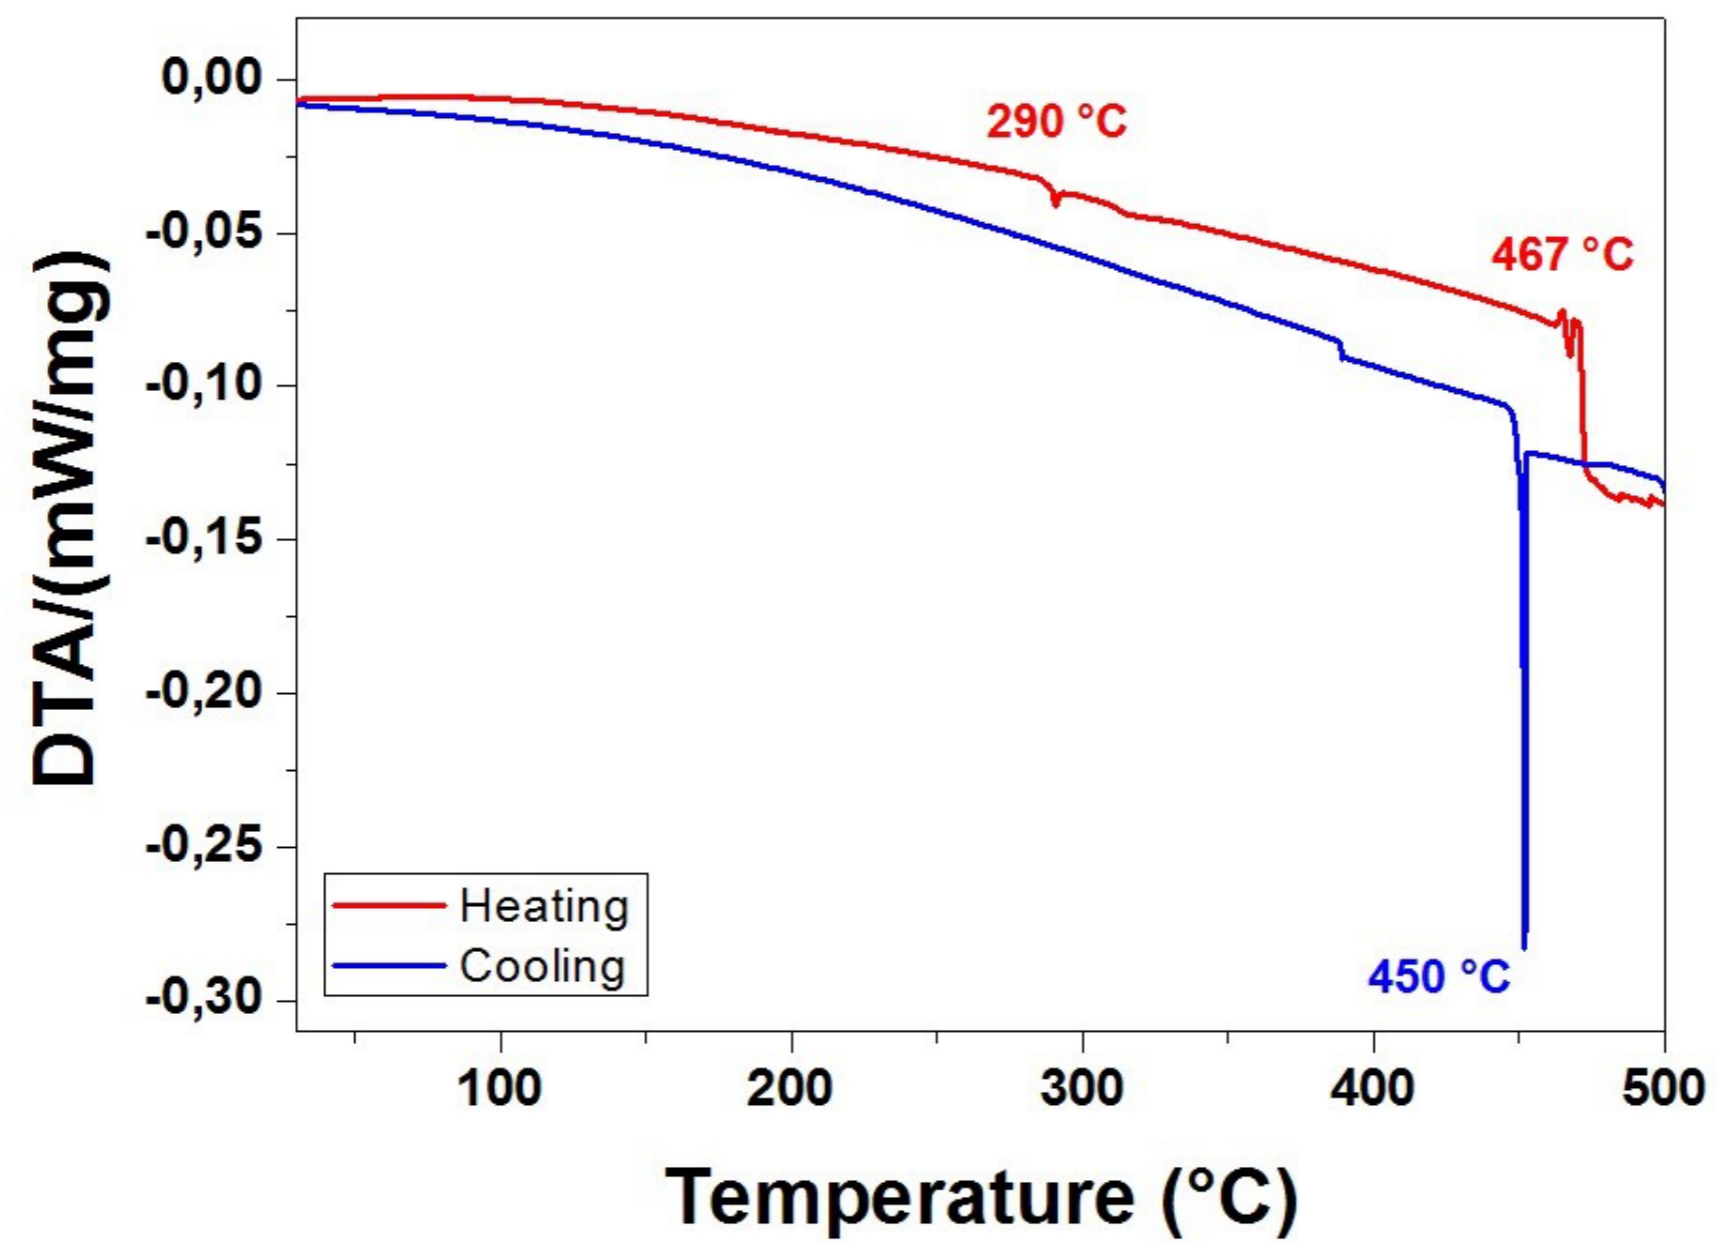

Supplement: d0dt02126a6.pdf [file d0dt02126a6.pdf]

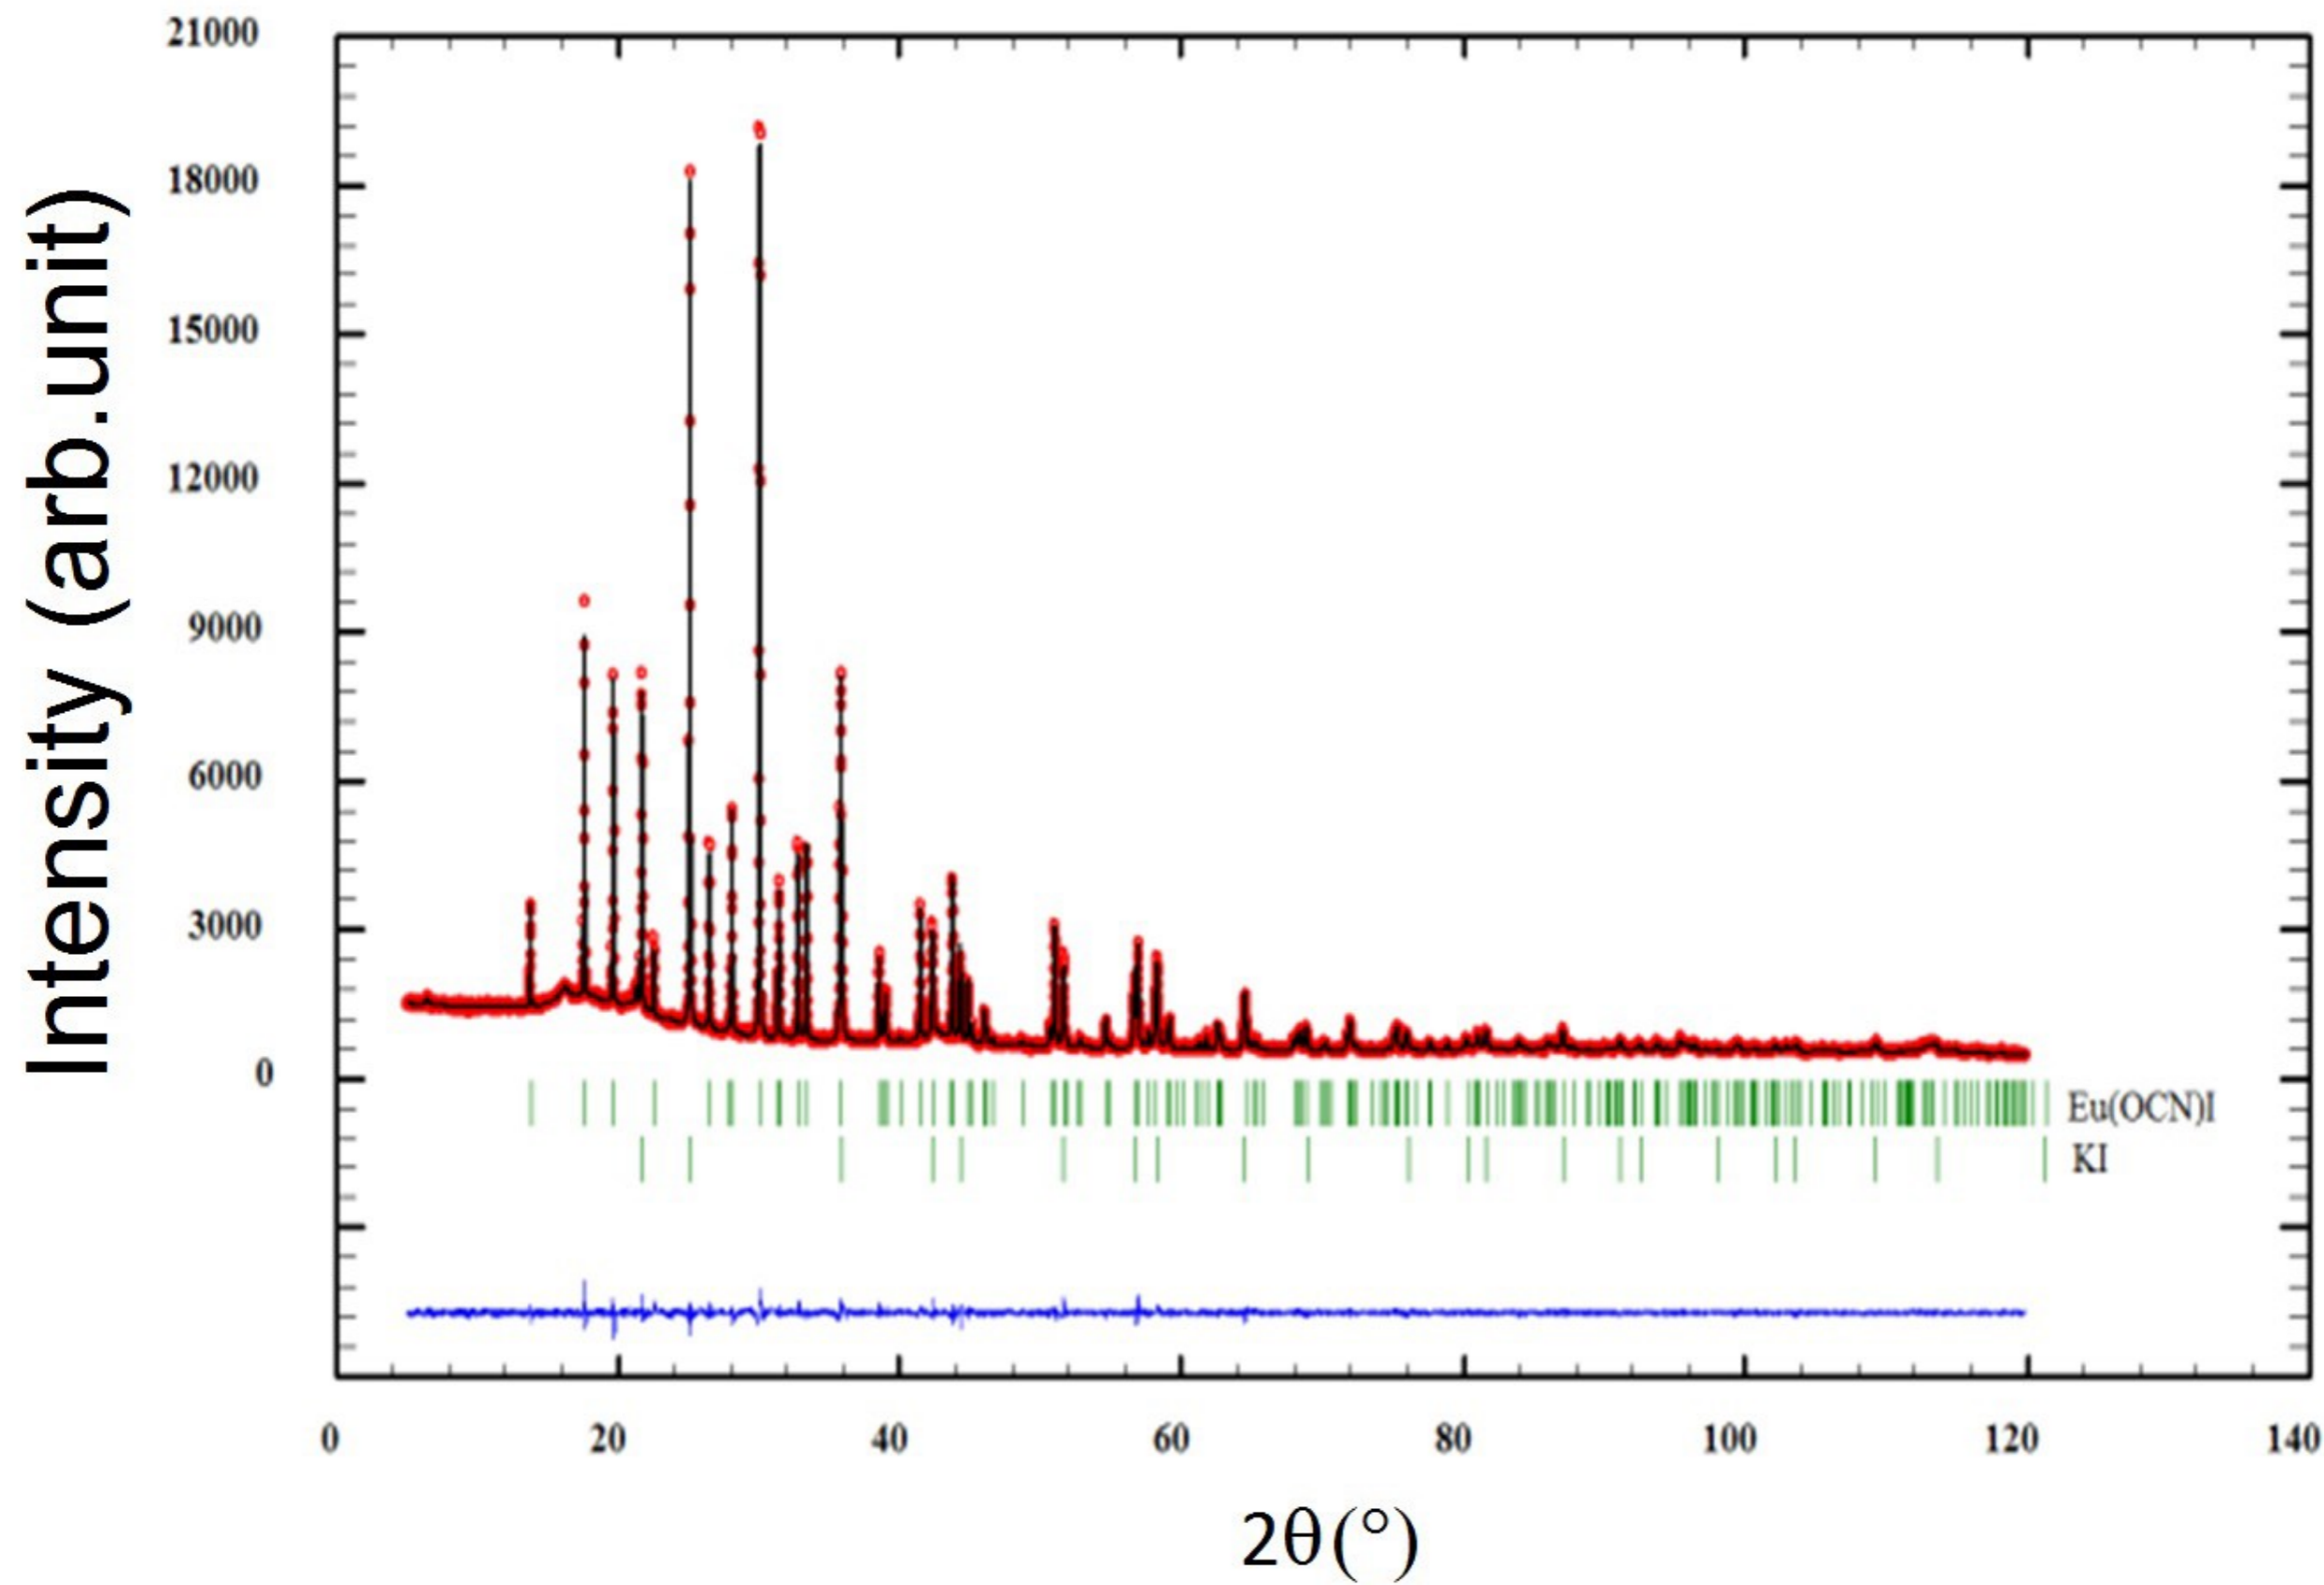

Supplement: d0dt02126a8.pdf [file d0dt02126a8.pdf]

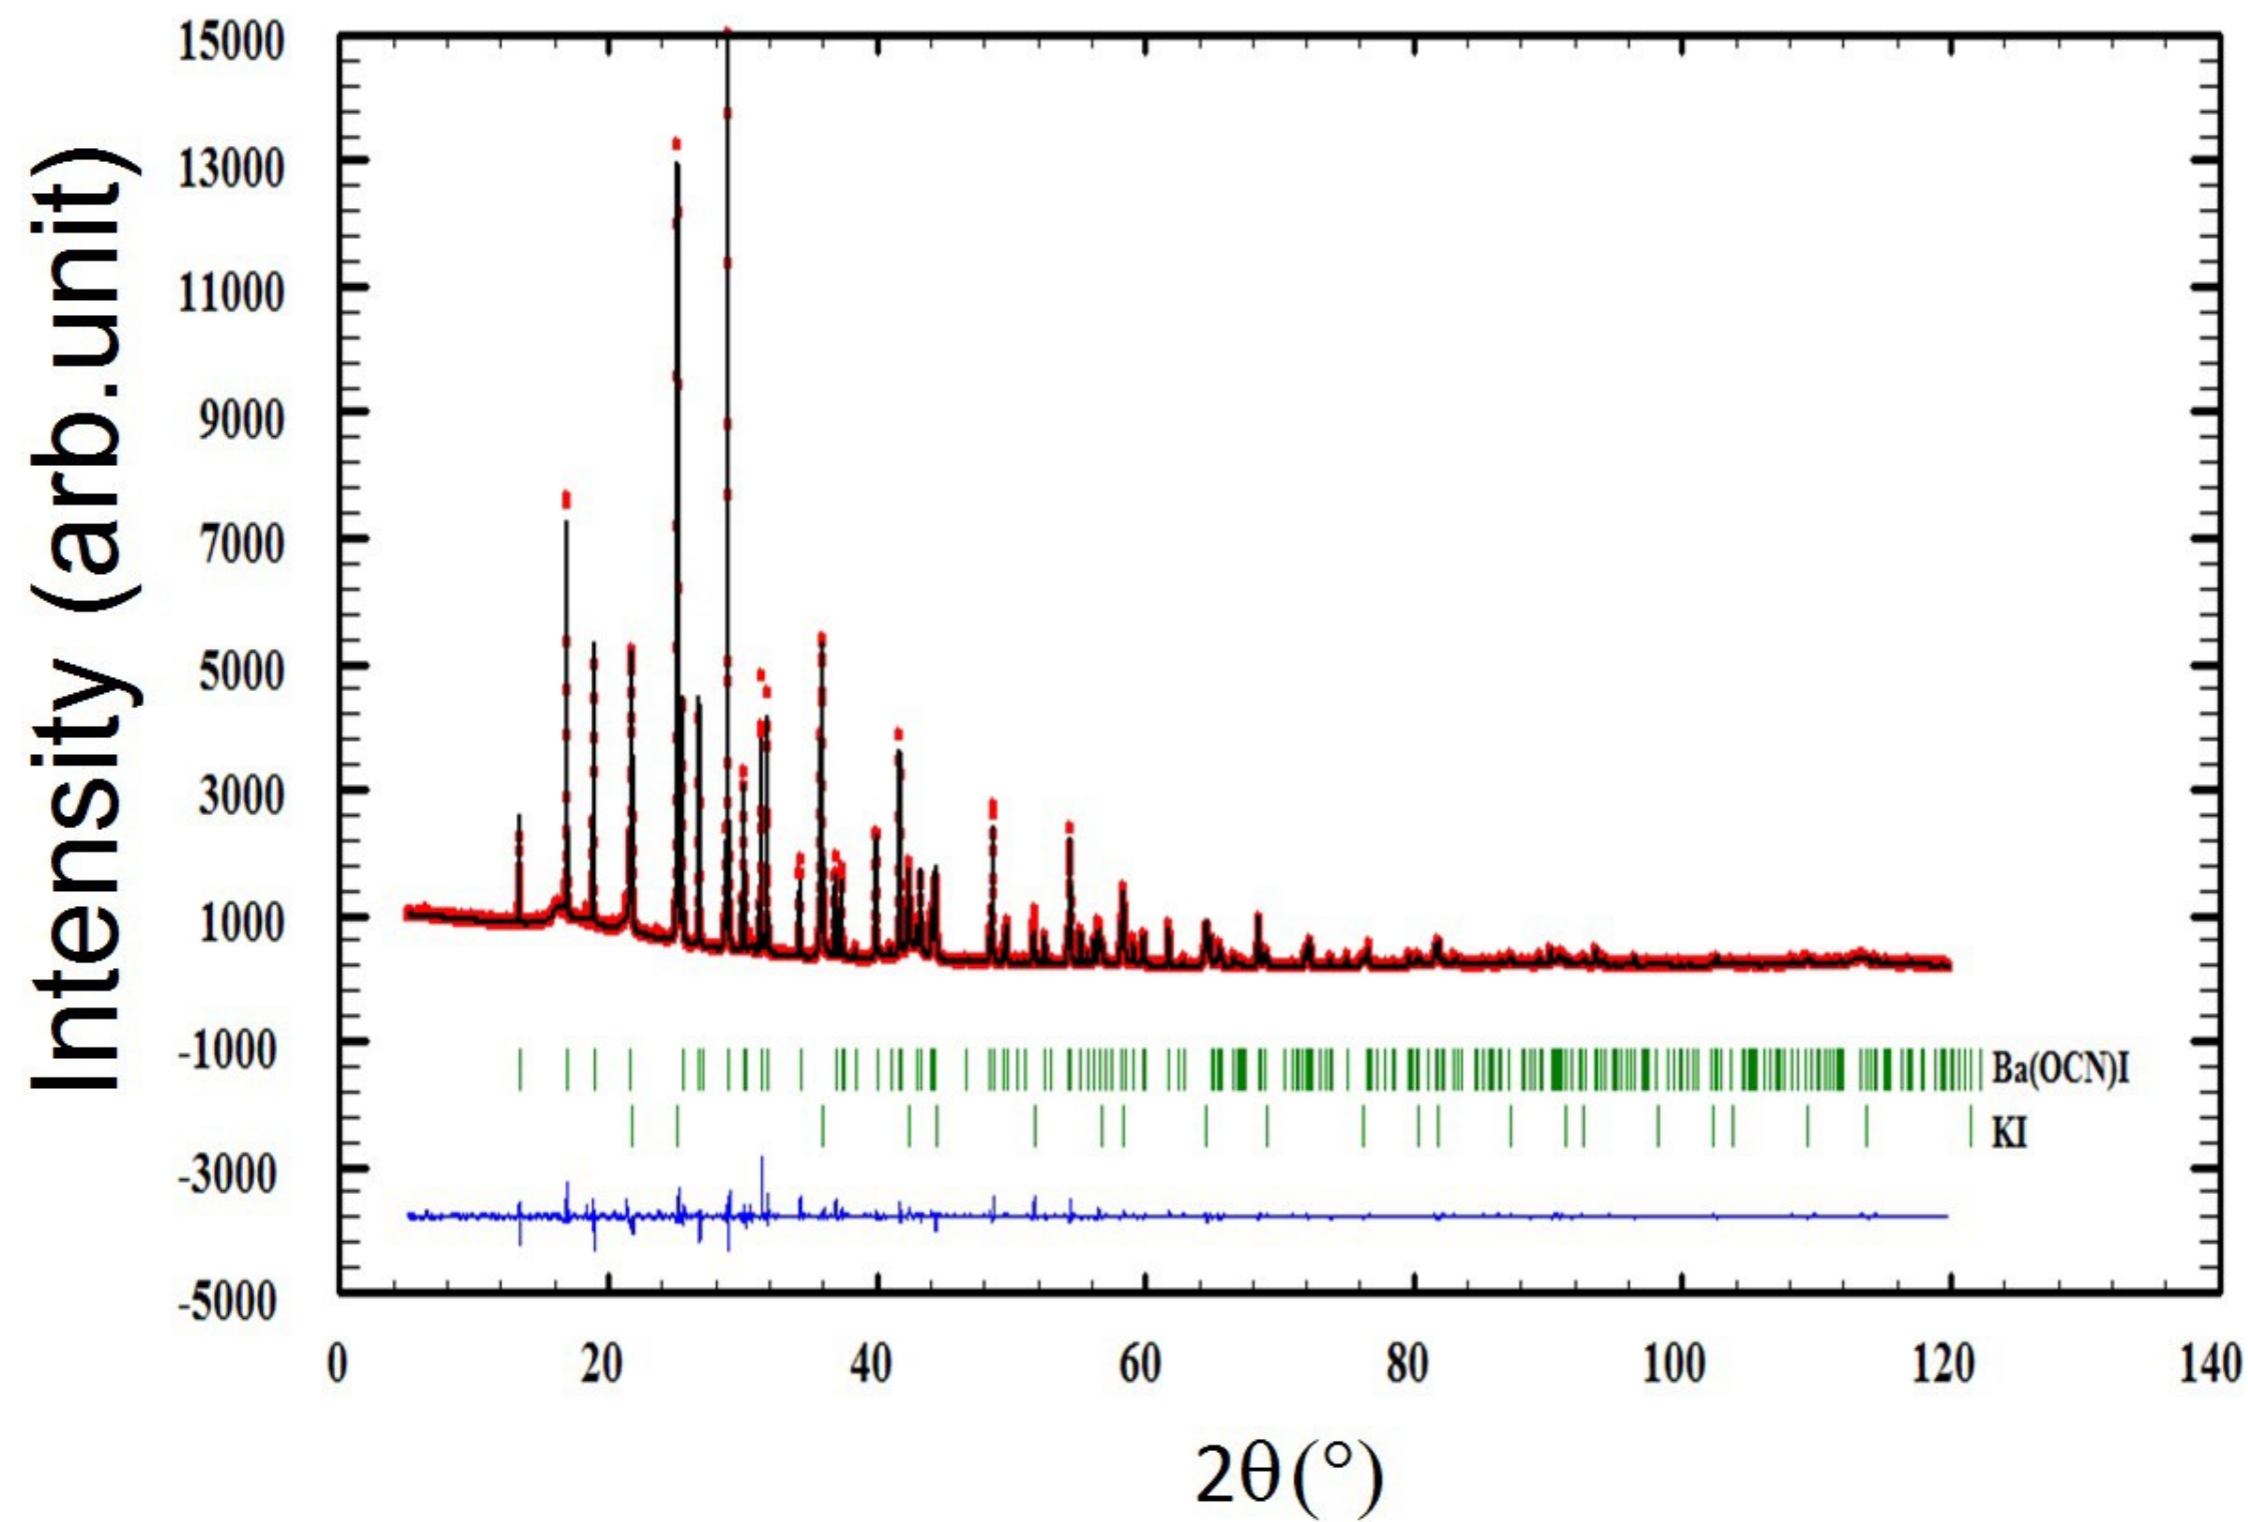

Supplement: d0dt02126a9.pdf [file d0dt02126a9.pdf]
